# Supplementary material for: Mobile barrier mechanisms for Na+-coupled symport in an MFS sugar transporter
Source: eLife journal article supplement (doi:10.7554/elife.92462), 2023-11-13
Supplement: fig1-data1 [file elife-92462-fig1-data1-v1.pdf]

Figure 1 – Source Data 1

***In vivo* two-hybrid interaction assay  
in *E. coli* DH5 $\alpha$  *cyaA* strain**

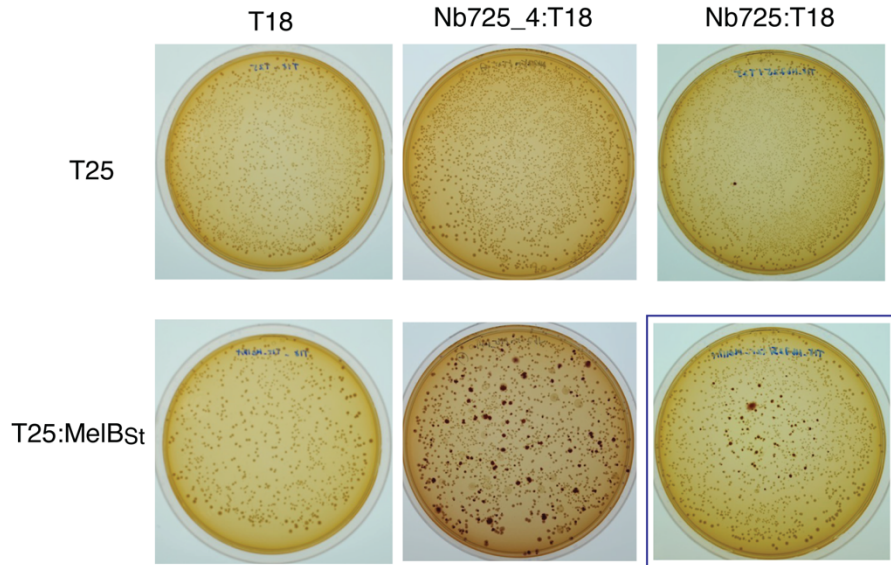

**Figure 1 – source data 1. *In vivo* two-hybrid interaction assay.** Two compatible plasmids derived from pACYC and pCS19 encoding T25:MelB<sub>St</sub> and Nb:T18, respectively, were transformed into *E. coli* DH5 $\alpha$  *cyaA* cells and plated on the maltose-containing MacConkey agar plate as described in Methods. The irregular red colonies are typical of a positive test indicating a protein-protein interaction. The Figure 1a was cropped from above images. The image for the two hybrids T25:MelB<sub>St</sub> and Nb725:T18 as boxed in blue was re-used from a JBC paper figure 3a<sup>29</sup> (<https://doi.org/10.1016/j.jbc.2023.104967>). Creative Commons Attribution (CC BY 4.0) |
