# Supplementary material for: Mobile barrier mechanisms for Na+-coupled symport in an MFS sugar transporter
Source: eLife journal article supplement (doi:10.7554/elife.92462), 2023-11-13
Supplement: fig1-data2 [file elife-92462-fig1-data2-v1.pdf]

Figure 1 – Source Data 2

Nbs specifically inhibit melibiose fermentation  
in *E. coli* DW2 strain

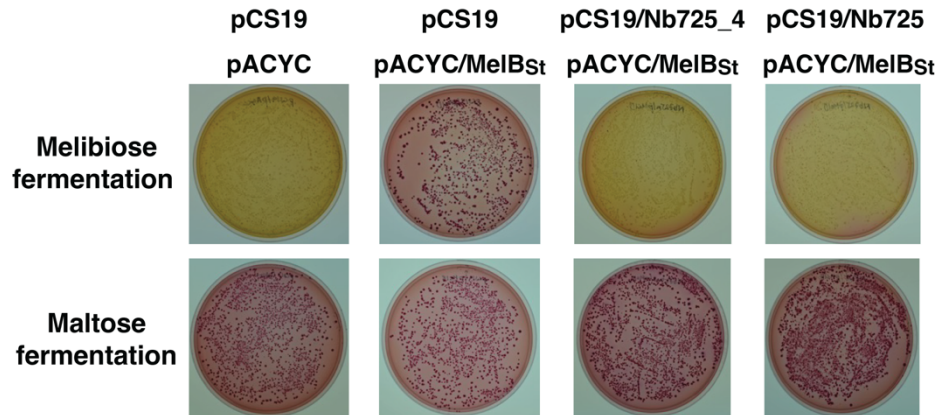

**Figure 1 – source data 2. Sugar fermentation assay.** Two compatible plasmids derived from pACYC and pCS19 encoding MelB<sub>St</sub> and Nb725 or Nb725\_4, respectively, were transformed into *E. coli* DW2 cells [ $\Delta melB\Delta lacYZ$ ] and plated on the MacConkey agar plate containing maltose (for the positive control) or melibiose (for testing the transport activity of MelB<sub>St</sub>) as the sole carbon source. Magenta: strong sugar fermentation; yellow: no sugar fermentation.
