# Supplementary material for: Mobile barrier mechanisms for Na+-coupled symport in an MFS sugar transporter
Source: eLife journal article supplement (doi:10.7554/elife.92462), 2023-11-13
Supplement: fig1-data4 [file elife-92462-fig1-data4-v1.pdf]

Figure 1 - source data 4

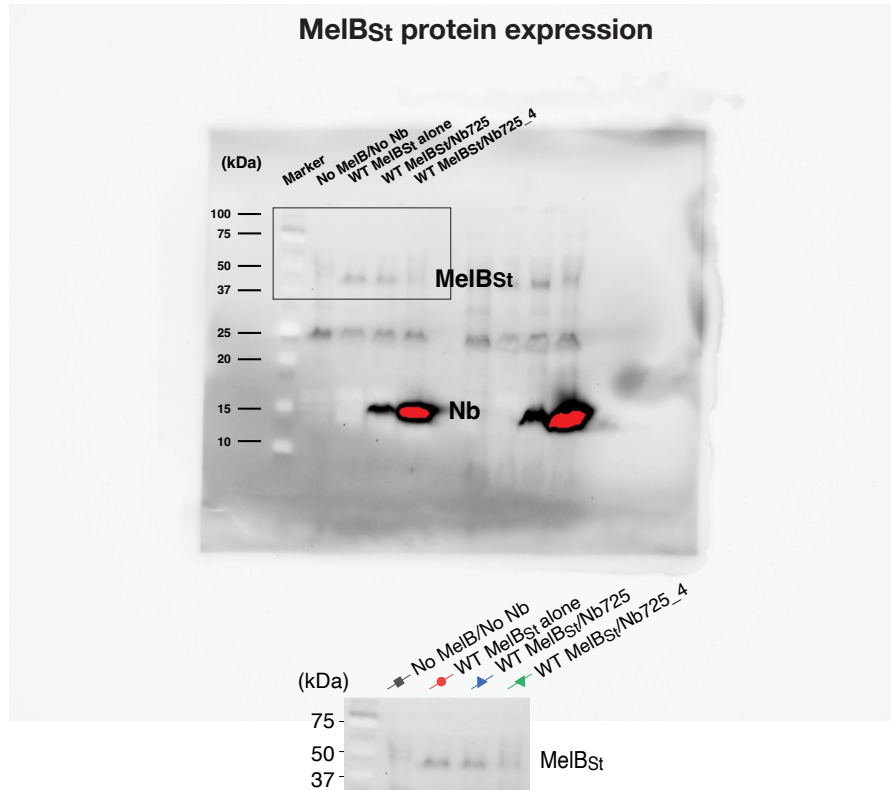

**Figure 1 – source data 4.** Western blot to detect MelB<sub>St</sub> expression when co-expressing with Nb725 or Nb725\_4. Membranes were prepared from *E. coli* DW2 cells that were transformed with two compatible plasmids derived from pACYC and pCS19 encoding MelB<sub>St</sub> and Nb725\_4 or Nb725, respectively, and used for the [<sup>3</sup>H]melibiose active transport assay. After protein concentration determination, 50 µg of total membrane proteins of each sample was analyzed by SDS-15%PAGE and western blot using anti-His tag antibody (HisProbe™-HRP Conjugate) as described in Methods. The western blot result was imaged by the ChemiDoc MP Imaging System (Bio-Rad). MelB<sub>St</sub> protein expression presented as the inset in figure 1c was highlighted by the box. The bands migrating near 25 kDa are non-specific and also presented in the membranes with no MelB nor Nb.
