# Supplementary material for: Mobile barrier mechanisms for Na+-coupled symport in an MFS sugar transporter
Source: eLife journal article supplement (doi:10.7554/elife.92462), 2023-11-13
Supplement: fig2-figsupp8-data2 [file elife-92462-fig2-figsupp8-data2-v1.pdf]

**Figure 2—figure supplement 8-source data 2**

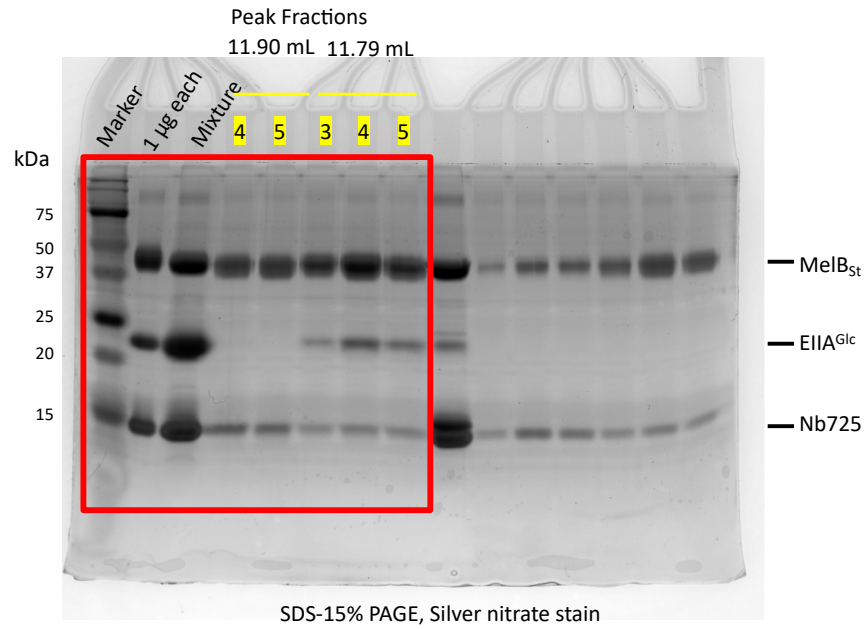

**Figure 2—figure supplement 8-source data 2.** Fractions collected from gel chromatography were analyzed by SDS-15% PAGE and stained by silver nitrate.
