# Supplementary material for: Mobile barrier mechanisms for Na+-coupled symport in an MFS sugar transporter
Source: eLife. 2024 Feb 21;12:RP92462. doi: 10.7554/eLife.92462 (PMC10942615; doi:10.7554/eLife.92462)
Supplement: Figure 5—source data 1. [file elife-92462-fig5-data1.csv]

Protein State	Protein	Start	End	Sequence	Peptide Mass	RT (min)	Deut Time (sec)	maxD	Theor Uptake #D	#D	%D	Conf Interval (#D)	#Rep	Confidence	Stddev	p
MelB	MELB	1	7	SISMTTK	766.3895	1.8697	0	5	0	0	0	n/a	1	Medium	0
MelB	MELB	1	7	SISMTTK	766.3895	1.8826	30	5	5	1.996	39.922	0.276	3	Medium	0.111
MelB	MELB	1	7	SISMTTK	766.3895	1.8751	300	5	5	2.003	40.063	0.113	3	Medium	0.046
MelB	MELB	1	7	SISMTTK	766.3895	1.8802	3000	5	5	2.138	42.758	0.28	3	Medium	0.113
MelB	MELB	1	8	SISMTTKL	879.4736	4.1209	0	6	0	0	0	n/a	1	High	0
MelB	MELB	1	8	SISMTTKL	879.4736	4.1329	30	6	5.998	2.092	34.863	0.18	3	Medium	0.073
MelB	MELB	1	8	SISMTTKL	879.4736	4.1257	300	6	6	2.081	34.691	0.229	3	Medium	0.092
MelB	MELB	1	8	SISMTTKL	879.4736	4.1046	3000	6	6	2.297	38.29	0.426	3	Medium	0.172
MelB	MELB	4	9	MTTKLS	679.3575	1.7428	0	4	0	0	0	n/a	1	Medium	0
MelB	MELB	4	9	MTTKLS	679.3575	1.7488	30	4	3.998	0.35	8.76	0.158	3	Medium	0.064
MelB	MELB	4	9	MTTKLS	679.3575	1.7347	300	4	4	0.293	7.335	0.576	2	Medium	0.064
MelB	MELB	4	9	MTTKLS	679.3575	1.7687	3000	4	4	0.518	12.951	0.257	3	Medium	0.103
MelB	MELB	6	14	TKLSYGFGA	942.4811	4.5511	0	7	0	0	0	n/a	1	Medium	0
MelB	MELB	6	14	TKLSYGFGA	942.4811	4.5971	30	7	6.998	0.114	1.624	0.016	3	Medium	0.007
MelB	MELB	6	14	TKLSYGFGA	942.4811	4.5545	300	7	7	0.064	0.916	0.086	3	Medium	0.035
MelB	MELB	6	14	TKLSYGFGA	942.4811	4.5689	3000	7	7	0.122	1.736	0.264	3	Medium	0.106
MelB	MELB	12	17	FGAFGK	625.3224	3.4513	0	4	0	0	0	n/a	1	Medium	0
MelB	MELB	12	17	FGAFGK	625.3224	3.4407	30	4	4	0.133	3.327	0.306	3	Medium	0.123
MelB	MELB	12	17	FGAFGK	625.3224	3.4508	300	4	4	0.164	4.099	0.159	3	Medium	0.064
MelB	MELB	12	17	FGAFGK	625.3224	3.4564	3000	4	4	0.02	0.497	0.196	3	Medium	0.079
MelB	MELB	23	28	IVYMYL	800.4142	8.3333	0	4	0	0	0	n/a	1	High	0
MelB	MELB	23	28	IVYMYL	800.4142	8.357	30	4	3.994	0.064	1.591	0.069	3	High	0.028
MelB	MELB	23	28	IVYMYL	800.4142	8.3443	300	4	4	0.268	6.707	0.195	3	Medium	0.079
MelB	MELB	23	28	IVYMYL	800.4142	8.3522	3000	4	4	0.807	20.182	0.181	3	Medium	0.073
MelB	MELB	26	29	MYLM	556.2389	6.4935	0	2	0	0	0	n/a	1	Medium	0
MelB	MELB	26	29	MYLM	556.2389	6.527	30	2	1.995	0.204	10.2	0.279	3	Medium	0.112
MelB	MELB	26	29	MYLM	556.2389	6.4934	300	2	2	0.457	22.83	0.263	3	Medium	0.106
MelB	MELB	26	29	MYLM	556.2389	6.5028	3000	2	2	0.572	28.623	0.015	3	Medium	0.006
MelB	MELB	29	34	MYYYTD	854.3157	4.43	0	4	0	0	0	n/a	1	Medium	0
MelB	MELB	29	34	MYYYTD	854.3157	4.5084	30	4	4	0.024	0.597	0.01	3	Medium	0.004
MelB	MELB	29	34	MYYYTD	854.3157	4.4924	300	4	4	0.031	0.765	0.015	3	Medium	0.006
MelB	MELB	29	34	MYYYTD	854.3157	4.4411	3000	4	4	0.033	0.818	0.06	3	Medium	0.024
MelB	MELB	35	46	VVGLSVGLVGTL	1112.6805	8.1941	0	10	0	0	0	n/a	1	Medium	0
MelB	MELB	35	46	VVGLSVGLVGTL	1112.6805	8.1073	30	10	9.885	0.283	2.834	0.612	3	Medium	0.246
MelB	MELB	35	46	VVGLSVGLVGTL	1112.6805	8.0981	300	10	10	0.528	5.279	0.625	3	Medium	0.252
MelB	MELB	35	46	VVGLSVGLVGTL	1112.6805	8.1321	3000	10	10	0.891	8.907	0.196	3	Medium	0.079
MelB	MELB	39	46	SVGLVGTL	744.4382	5.9878	0	6	0	0	0	n/a	1	High	0
MelB	MELB	39	46	SVGLVGTL	744.4382	5.9858	30	6	5.886	0.237	3.948	0.363	3	High	0.146
MelB	MELB	39	46	SVGLVGTL	744.4382	5.986	300	6	6	0.498	8.3	0.33	3	Medium	0.133
MelB	MELB	39	46	SVGLVGTL	744.4382	6.024	3000	6	6	0.637	10.614	0.227	3	Medium	0.091
MelB	MELB	39	48	SVGLVGTLFL	1004.5906	10.037	0	8	0	0	0	n/a	1	High	0
MelB	MELB	39	48	SVGLVGTLFL	1004.5906	10.0625	30	8	7.881	0.213	2.668	0.241	3	High	0.097
MelB	MELB	39	48	SVGLVGTLFL	1004.5906	10.0496	300	8	8	0.277	3.464	0.482	3	Medium	0.194
MelB	MELB	39	48	SVGLVGTLFL	1004.5906	10.0713	3000	8	8	0.518	6.473	0.055	3	Medium	0.022
MelB	MELB	40	47	VGLVGTLF	804.4745	8.825	0	6	0	0	0	n/a	1	Medium	0
MelB	MELB	40	47	VGLVGTLF	804.4745	8.8195	30	6	5.885	0.336	5.595	0.266	3	Medium	0.107
MelB	MELB	40	47	VGLVGTLF	804.4745	8.8238	300	6	6	0.608	10.129	0.107	3	Medium	0.043
MelB	MELB	40	47	VGLVGTLF	804.4745	8.8469	3000	6	6	0.991	16.523	0.572	3	Medium	0.23
MelB	MELB	42	46	LVGTL	501.3162	3.8835	0	3	0	0	0	n/a	1	Medium	0
MelB	MELB	42	46	LVGTL	501.3162	5.0061	30	3	2.999	0.126	4.209	0.195	3	Medium	0.079
MelB	MELB	42	46	LVGTL	501.3162	4.9167	300	3	3	0.356	11.879	0.138	3	Medium	0.055
MelB	MELB	42	46	LVGTL	501.3162	3.939	3000	3	3	0.271	9.019	0.067	3	Medium	0.027
MelB	MELB	47	51	FLVAR	604.3697	2.6012	0	3	0	0	0	n/a	1	Medium	0
MelB	MELB	47	51	FLVAR	604.3697	2.64	30	3	2.888	0.009	0.284	0.015	3	High	0.006
MelB	MELB	47	51	FLVAR	604.3697	2.6212	300	3	3	0.028	0.921	0.022	3	High	0.009
MelB	MELB	47	51	FLVAR	604.3697	2.6724	3000	3	3	0.018	0.584	0.013	3	High	0.005
MelB	MELB	47	53	FLVARIW	903.5331	7.5949	0	5	0	0	0	n/a	1	High	0
MelB	MELB	47	53	FLVARIW	903.5331	7.5441	30	5	4.867	0.009	0.187	0.008	3	High	0.003
MelB	MELB	47	53	FLVARIW	903.5331	7.5422	300	5	5	0.027	0.533	0.022	3	High	0.009
MelB	MELB	47	53	FLVARIW	903.5331	7.5696	3000	5	5	0.028	0.552	0.021	3	High	0.008
MelB	MELB	48	53	LVARIW	756.4646	5.6026	0	4	0	0	0	n/a	1	Medium	0
MelB	MELB	48	53	LVARIW	756.4646	5.6225	30	4	3.979	0.025	0.62	0.031	3	Medium	0.013
MelB	MELB	48	53	LVARIW	756.4646	5.5963	300	4	4	0.037	0.929	0.023	3	Medium	0.009
MelB	MELB	48	53	LVARIW	756.4646	5.6614	3000	4	4	0.023	0.566	0.044	3	Medium	0.018
MelB	MELB	49	53	VARIW	643.3806	4.609	0	3	0	0	0	n/a	1	High	0
MelB	MELB	49	53	VARIW	643.3806	4.6182	30	3	2.979	0.019	0.63	0.009	3	High	0.004
MelB	MELB	49	53	VARIW	643.3806	4.6023	300	3	3	0.034	1.147	0.022	3	Medium	0.009
MelB	MELB	49	53	VARIW	643.3806	4.6615	3000	3	3	0.021	0.715	0.009	3	High	0.003
MelB	MELB	52	61	IWDAINDPIM	1186.5692	7.9952	0	7	0	0	0	n/a	1	High	0
MelB	MELB	52	61	IWDAINDPIM	1186.5692	7.9908	30	7	6.817	0.012	0.172	0.027	3	High	0.011
MelB	MELB	52	61	IWDAINDPIM	1186.5692	7.9804	300	7	7	0.024	0.34	0.046	3	Medium	0.018
MelB	MELB	52	61	IWDAINDPIM	1186.5692	7.9854	3000	7	7	0.012	0.166	0.013	3	High	0.005
MelB	MELB	54	66	DAINDPIMGWIVN	1456.7021	9.3861	0	10	0	0	0	n/a	1	High	0
MelB	MELB	54	66	DAINDPIMGWIVN	1456.7021	9.4238	30	10	9.617	0.039	0.393	0.043	3	High	0.017
MelB	MELB	54	66	DAINDPIMGWIVN	1456.7021	9.3594	300	10	10	0.056	0.558	0.056	3	High	0.023
MelB	MELB	54	66	DAINDPIMGWIVN	1456.7021	9.3736	3000	10	10	0.091	0.913	0.05	3	High	0.02
MelB	MELB	56	61	INDPIM	701.3418	4.5247	0	3	0	0	0	n/a	1	Medium	0
MelB	MELB	56	61	INDPIM	701.3418	4.5103	30	3	2.853	0.054	1.796	0.059	3	Medium	0.024
MelB	MELB	56	61	INDPIM	701.3418	4.4925	300	3	3	0.043	1.425	0.149	3	Medium	0.06
MelB	MELB	56	61	INDPIM	701.3418	4.551	3000	3	3	0.003	0.094	0.033	3	Medium	0.013
MelB	MELB	62	65	GWIV	473.2638	7.1479	0	2	0	0	0	n/a	1	High	0
MelB	MELB	62	65	GWIV	473.2638	7.1672	30	2	1.801	0.003	0.148	0.003	3	High	0.001
MelB	MELB	62	65	GWIV	473.2638	7.175	300	2	2	0.002	0.077	0.019	3	Medium	0.008
MelB	MELB	62	65	GWIV	473.2638	7.1826	3000	2	2	0.003	0.157	0.007	3	Medium	0.003
MelB	MELB	62	66	GWIVN	587.3067	5.539	0	3	0	0	0	n/a	1	Medium	0
MelB	MELB	62	66	GWIVN	587.3067	5.5631	30	3	2.801	0.005	0.156	0.026	2	Medium	0.003
MelB	MELB	62	66	GWIVN	587.3067	5.5484	300	3	3	0.01	0.319	0.018	3	Medium	0.007
MelB	MELB	62	66	GWIVN	587.3067	5.5499	3000	3	3	0.034	1.14	0.027	3	Medium	0.011
MelB	MELB	70	76	SRWGKFK	907.5028	2.3747	0	5	0	0	0	n/a	1	Medium	0
MelB	MELB	70	76	SRWGKFK	907.5028	2.1577	30	5	5	0.15	2.997	0.372	3	Medium	0.15
MelB	MELB	70	76	SRWGKFK	907.5028	2.1543	300	5	5	0.316	6.313	0.339	3	Medium	0.136
MelB	MELB	70	76	SRWGKFK	907.5028	2.2108	3000	5	5	0.187	3.731	0.303	3	Medium	0.122
MelB	MELB	72	80	WGKFKPWIL	1173.6699	8.1488	0	6	0	0	0	n/a	1	Medium	0
MelB	MELB	72	80	WGKFKPWIL	1173.6699	8.1827	30	6	5.845	0.13	2.175	0.048	3	Medium	0.019
MelB	MELB	72	80	WGKFKPWIL	1173.6699	8.1691	300	6	6	0.252	4.205	0.134	3	Medium	0.054
MelB	MELB	72	80	WGKFKPWIL	1173.6699	8.1714	3000	6	6	0.396	6.594	0.284	3	Medium	0.114
MelB	MELB	81	88	IGTLTNSL	817.4545	4.9675	0	6	0	0	0	n/a	1	Medium	0
MelB	MELB	81	88	IGTLTNSL	817.4545	4.9727	30	6	5.999	0.083	1.379	0.025	3	Medium	0.01
MelB	MELB	81	88	IGTLTNSL	817.4545	4.9666	300	6	6	0.113	1.878	0.182	3	Medium	0.073
MelB	MELB	81	88	IGTLTNSL	817.4545	4.9561	3000	6	6	0.128	2.133	0.132	3	Medium	0.053
MelB	MELB	85	90	TNSLVL	645.3697	5.2914	0	4	0	0	0	n/a	1	Medium	0
MelB	MELB	85	90	TNSLVL	645.3697	5.2525	30	4	3.856	0.044	1.091	0.025	3	Medium	0.01
MelB	MELB	85	90	TNSLVL	645.3697	5.2595	300	4	4	0.041	1.036	0.017	3	Medium	0.007
MelB	MELB	85	90	TNSLVL	645.3697	5.2835	3000	4	4	0.039	0.963	0.013	3	Medium	0.005
MelB	MELB	87	90	SLVL	430.2791	5.3072	0	2	0	0	0	n/a	1	Medium	0
MelB	MELB	87	90	SLVL	430.2791	5.33	30	2	1.856	-0.002	-0.077	0.005	3	Medium	0.002
MelB	MELB	87	90	SLVL	430.2791	5.2894	300	2	2	0.001	0.029	0.004	3	Medium	0.002
MelB	MELB	87	90	SLVL	430.2791	5.3193	3000	2	2	-0.001	-0.05	0.005	3	Medium	0.002
MelB	MELB	92	97	LLFSAH	686.3752	4.3775	0	4	0	0	0	n/a	1	Medium	0
MelB	MELB	92	97	LLFSAH	686.3752	4.4078	30	4	3.998	0.072	1.811	0.027	3	Medium	0.011
MelB	MELB	92	97	LLFSAH	686.3752	4.4005	300	4	4	0.094	2.358	0.074	3	Medium	0.03
MelB	MELB	92	97	LLFSAH	686.3752	4.4322	3000	4	4	0.107	2.67	0.01	3	Medium	0.004
MelB	MELB	92	98	LLFSAHL	799.4592	6.6468	0	5	0	0	0	n/a	1	Medium	0
MelB	MELB	92	98	LLFSAHL	799.4592	6.6873	30	5	4.998	0.001	0.022	0.017	3	Medium	0.007
MelB	MELB	92	98	LLFSAHL	799.4592	6.6523	300	5	5	0.07	1.391	0.213	3	Medium	0.086
MelB	MELB	92	98	LLFSAHL	799.4592	6.6649	3000	5	5	0.048	0.959	0.088	3	Medium	0.035
MelB	MELB	94	99	FSAHLF	720.3595	6.0195	0	4	0	0	0	n/a	1	Medium	0
MelB	MELB	94	99	FSAHLF	720.3595	6.0267	30	4	3.998	0.013	0.314	0.005	3	Medium	0.002
MelB	MELB	94	99	FSAHLF	720.3595	6.0126	300	4	4	0.022	0.547	0.016	3	Medium	0.006
MelB	MELB	94	99	FSAHLF	720.3595	6.0371	3000	4	4	0.02	0.499	0.01	3	High	0.004
MelB	MELB	98	107	LFEGTAQVVF	1109.5757	7.5098	0	8	0	0	0	n/a	1	High	0
MelB	MELB	98	107	LFEGTAQVVF	1109.5757	7.5172	30	8	7.919	0.128	1.6	0.279	3	Medium	0.112
MelB	MELB	98	107	LFEGTAQVVF	1109.5757	7.5223	300	8	8	0.179	2.233	0.265	3	Medium	0.107
MelB	MELB	98	107	LFEGTAQVVF	1109.5757	7.5129	3000	8	8	0.378	4.721	0.145	3	Medium	0.059
MelB	MELB	100	107	EGTAQVVF	849.4232	5.323	0	6	0	0	0	n/a	1	Medium	0
MelB	MELB	100	107	EGTAQVVF	849.4232	5.3529	30	6	5.919	0.149	2.485	0.365	3	Medium	0.147
MelB	MELB	100	107	EGTAQVVF	849.4232	5.3303	300	6	6	0.366	6.108	0.287	3	Medium	0.115
MelB	MELB	100	107	EGTAQVVF	849.4232	5.3406	3000	6	6	0.685	11.416	0.201	3	Medium	0.081
MelB	MELB	100	109	EGTAQVVFVC	1051.5008	6.3361	0	8	0	0	0	n/a	1	High	0
MelB	MELB	100	109	EGTAQVVFVC	1051.5008	6.3732	30	8	7.903	0.091	1.137	0.176	3	Medium	0.071
MelB	MELB	100	109	EGTAQVVFVC	1051.5008	6.3776	300	8	8	0.231	2.887	0.511	3	Medium	0.206
MelB	MELB	100	109	EGTAQVVFVC	1051.5008	6.3757	3000	8	8	0.146	1.829	0.195	3	Medium	0.078
MelB	MELB	107	112	FVCVTY	730.336	5.6186	0	4	0	0	0	n/a	1	Medium	0
MelB	MELB	107	112	FVCVTY	730.336	5.6331	30	4	4	-0.024	-0.6	0.031	3	Medium	0.013
MelB	MELB	107	112	FVCVTY	730.336	5.6247	300	4	4	-0.032	-0.799	0.004	3	Medium	0.001
MelB	MELB	107	112	FVCVTY	730.336	5.6342	3000	4	4	-0.012	-0.311	0.046	3	Medium	0.019
MelB	MELB	123	129	DIPFWSL	876.4382	10.2426	0	4	0	0	0	n/a	1	Medium	0
MelB	MELB	123	129	DIPFWSL	876.4382	10.2664	30	4	3.997	0.016	0.388	0.012	3	Medium	0.005
MelB	MELB	123	129	DIPFWSL	876.4382	10.2617	300	4	4	0.023	0.571	0.019	3	Medium	0.007
MelB	MELB	123	129	DIPFWSL	876.4382	10.2709	3000	4	4	0.017	0.429	0.015	3	Medium	0.006
MelB	MELB	124	129	IPFWSL	761.4112	9.9174	0	4	0	0	0	n/a	1	High	0
MelB	MELB	124	129	IPFWSL	761.4112	9.9202	30	4	3.997	0.014	0.362	0.024	3	High	0.01
MelB	MELB	124	129	IPFWSL	761.4112	9.9001	300	4	4	0.017	0.432	0.038	3	Medium	0.015
MelB	MELB	124	129	IPFWSL	761.4112	9.9226	3000	4	4	0.004	0.106	0.003	3	Medium	0.001
MelB	MELB	130	135	VPTITL	642.3952	5.9509	0	4	0	0	0	n/a	1	Medium	0
MelB	MELB	130	135	VPTITL	642.3952	5.9327	30	4	3.994	0.049	1.217	0.022	3	Medium	0.009
MelB	MELB	130	135	VPTITL	642.3952	5.9438	300	4	4	0.08	1.995	0.081	3	Medium	0.033
MelB	MELB	130	135	VPTITL	642.3952	5.9635	3000	4	4	0.136	3.401	0.175	3	Medium	0.07
MelB	MELB	136	149	DKREREQLVPFPRF	1815.9744	5.7872	0	10	0	0	0	n/a	1	Medium	0
MelB	MELB	136	149	DKREREQLVPFPRF	1815.9744	5.7286	30	10	9.885	0.555	5.549	0.489	3	Medium	0.197
MelB	MELB	136	149	DKREREQLVPFPRF	1815.9744	5.6922	300	10	10	0.928	9.275	0.229	3	Medium	0.092
MelB	MELB	136	149	DKREREQLVPFPRF	1815.9744	5.7258	3000	10	10	2.374	23.743	0.966	3	Medium	0.389
MelB	MELB	138	149	REREQLVPFPRF	1572.8525	5.9705	0	8	0	0	0	n/a	1	Medium	0
MelB	MELB	138	149	REREQLVPFPRF	1572.8525	5.9699	30	8	7.885	0.311	3.886	0.309	3	Medium	0.124
MelB	MELB	138	149	REREQLVPFPRF	1572.8525	5.9578	300	8	8	0.482	6.021	0.103	3	Medium	0.041
MelB	MELB	138	149	REREQLVPFPRF	1572.8525	5.9797	3000	8	8	1.378	17.227	0.696	3	Medium	0.28
MelB	MELB	138	150	REREQLVPFPRFF	1719.9209	7.4673	0	9	0	0	0	n/a	1	Medium	0
MelB	MELB	138	150	REREQLVPFPRFF	1719.9209	7.4899	30	9	8.885	0.551	6.126	0.429	3	Medium	0.173
MelB	MELB	138	150	REREQLVPFPRFF	1719.9209	7.4597	300	9	9	0.587	6.521	0.168	3	Medium	0.068
MelB	MELB	138	150	REREQLVPFPRFF	1719.9209	7.5165	3000	9	9	1.743	19.372	0.663	3	Medium	0.267
MelB	MELB	139	149	EREQLVPFPRF	1416.7514	6.743	0	7	0	0	0	n/a	1	Medium	0
MelB	MELB	139	149	EREQLVPFPRF	1416.7514	6.7794	30	7	6.885	0.363	5.19	0.42	3	Medium	0.169
MelB	MELB	139	149	EREQLVPFPRF	1416.7514	6.7572	300	7	7	0.559	7.982	0.128	3	High	0.051
MelB	MELB	139	149	EREQLVPFPRF	1416.7514	6.8004	3000	7	7	1.617	23.103	0.481	3	Medium	0.193
MelB	MELB	139	150	EREQLVPFPRFF	1563.8198	8.2241	0	8	0	0	0	n/a	1	Medium	0
MelB	MELB	139	150	EREQLVPFPRFF	1563.8198	8.2827	30	8	7.885	0.338	4.23	0.378	3	High	0.152
MelB	MELB	139	150	EREQLVPFPRFF	1563.8198	8.1837	300	8	8	0.554	6.931	0.166	3	High	0.067
MelB	MELB	139	150	EREQLVPFPRFF	1563.8198	8.2378	3000	8	8	1.703	21.29	0.494	3	Medium	0.199
MelB	MELB	139	152	EREQLVPFPRFFAS	1721.8889	7.7536	0	10	0	0	0	n/a	1	Medium	0
MelB	MELB	139	152	EREQLVPFPRFFAS	1721.8889	7.7849	30	10	9.885	0.331	3.311	0.368	3	Medium	0.148
MelB	MELB	139	152	EREQLVPFPRFFAS	1721.8889	7.7648	300	10	10	0.581	5.807	0.156	3	Medium	0.063
MelB	MELB	139	152	EREQLVPFPRFFAS	1721.8889	7.7186	3000	10	10	2.221	22.211	0.963	3	Medium	0.388
MelB	MELB	139	153	EREQLVPFPRFFASL	1834.973	9.3149	0	11	0	0	0	n/a	1	High	0
MelB	MELB	139	153	EREQLVPFPRFFASL	1834.973	9.3287	30	11	10.885	0.345	3.134	0.33	3	Medium	0.133
MelB	MELB	139	153	EREQLVPFPRFFASL	1834.973	9.3022	300	11	11	0.601	5.463	0.141	3	High	0.057
MelB	MELB	139	153	EREQLVPFPRFFASL	1834.973	9.3063	3000	11	11	1.998	18.166	0.435	3	Medium	0.175
MelB	MELB	140	149	REQLVPFPRF	1287.7088	6.6674	0	6	0	0	0	n/a	1	Medium	0
MelB	MELB	140	149	REQLVPFPRF	1287.7088	6.6925	30	6	5.885	0.179	2.978	0.208	3	Medium	0.084
MelB	MELB	140	149	REQLVPFPRF	1287.7088	6.6925	300	6	6	0.374	6.236	0.135	3	Medium	0.054
MelB	MELB	140	149	REQLVPFPRF	1287.7088	6.702	3000	6	6	1.236	20.595	0.566	3	Medium	0.228
MelB	MELB	141	149	EQLVPFPRF	1131.6077	7.616	0	5	0	0	0	n/a	1	Medium	0
MelB	MELB	141	149	EQLVPFPRF	1131.6077	7.6355	30	5	4.885	0.161	3.217	0.187	3	Medium	0.075
MelB	MELB	141	149	EQLVPFPRF	1131.6077	7.6363	300	5	5	0.3	5.999	0.072	3	High	0.029
MelB	MELB	141	149	EQLVPFPRF	1131.6077	7.6667	3000	5	5	0.944	18.87	0.385	3	Medium	0.155
MelB	MELB	141	150	EQLVPFPRFF	1278.6761	9.1979	0	6	0	0	0	n/a	1	High	0
MelB	MELB	141	150	EQLVPFPRFF	1278.6761	9.1495	30	6	5.885	0.207	3.444	0.197	3	High	0.079
MelB	MELB	141	150	EQLVPFPRFF	1278.6761	9.114	300	6	6	0.311	5.183	0.092	3	High	0.037
MelB	MELB	141	150	EQLVPFPRFF	1278.6761	9.219	3000	6	6	0.968	16.132	0.428	3	Medium	0.172
MelB	MELB	141	152	EQLVPFPRFFAS	1436.7452	8.5095	0	8	0	0	0	n/a	1	High	0
MelB	MELB	141	152	EQLVPFPRFFAS	1436.7452	8.4852	30	8	7.885	0.223	2.788	0.235	3	Medium	0.095
MelB	MELB	141	152	EQLVPFPRFFAS	1436.7452	8.497	300	8	8	0.398	4.98	0.07	3	Medium	0.028
MelB	MELB	141	152	EQLVPFPRFFAS	1436.7452	8.5088	3000	8	8	1.352	16.906	0.287	3	Medium	0.116
MelB	MELB	141	153	EQLVPFPRFFASL	1549.8293	10.0867	0	9	0	0	0	n/a	1	High	0
MelB	MELB	141	153	EQLVPFPRFFASL	1549.8293	10.1068	30	9	8.885	0.245	2.721	0.276	3	High	0.111
MelB	MELB	141	153	EQLVPFPRFFASL	1549.8293	10.1035	300	9	9	0.394	4.372	0.168	3	Medium	0.068
MelB	MELB	141	153	EQLVPFPRFFASL	1549.8293	10.047	3000	9	9	1.371	15.23	0.407	3	Medium	0.164
MelB	MELB	142	149	QLVPFPRF	1002.5651	7.5206	0	4	0	0	0	n/a	1	High	0
MelB	MELB	142	149	QLVPFPRF	1002.5651	7.5007	30	4	3.885	0.122	3.048	0.074	3	High	0.03
MelB	MELB	142	149	QLVPFPRF	1002.5651	7.5129	300	4	4	0.208	5.191	0.096	3	High	0.039
MelB	MELB	142	149	QLVPFPRF	1002.5651	7.4978	3000	4	4	0.562	14.043	0.345	3	Medium	0.139
MelB	MELB	143	149	LVPFPRF	874.5065	7.185	0	3	0	0	0	n/a	1	Medium	0
MelB	MELB	143	149	LVPFPRF	874.5065	7.1831	30	3	2.997	0.12	4	0.103	3	Medium	0.041
MelB	MELB	143	149	LVPFPRF	874.5065	7.1856	300	3	3	0.193	6.429	0.076	3	Medium	0.03
MelB	MELB	143	149	LVPFPRF	874.5065	7.1974	3000	3	3	0.523	17.44	0.305	3	Medium	0.123
MelB	MELB	143	150	LVPFPRFF	1021.5749	9.0323	0	4	0	0	0	n/a	1	High	0
MelB	MELB	143	150	LVPFPRFF	1021.5749	9.0491	30	4	3.997	0.145	3.636	0.133	3	High	0.053
MelB	MELB	143	150	LVPFPRFF	1021.5749	9.0181	300	4	4	0.216	5.409	0.12	3	Medium	0.048
MelB	MELB	143	150	LVPFPRFF	1021.5749	9.0398	3000	4	4	0.722	18.044	0.516	3	Medium	0.208
MelB	MELB	150	153	FASL	436.2322	4.4826	0	2	0	0	0	n/a	1	High	0
MelB	MELB	150	153	FASL	436.2322	4.4942	30	2	2	0.036	1.797	0.067	3	Medium	0.027
MelB	MELB	150	153	FASL	436.2322	4.4747	300	2	2	0.046	2.321	0.014	3	Medium	0.006
MelB	MELB	150	153	FASL	436.2322	4.4536	3000	2	2	0.295	14.749	0.104	3	Medium	0.042
MelB	MELB	154	158	AGFVT	493.2536	3.2729	0	3	0	0	0	n/a	1	High	0
MelB	MELB	154	158	AGFVT	493.2536	3.28	30	3	2.983	0.166	5.52	0.116	3	High	0.047
MelB	MELB	154	158	AGFVT	493.2536	3.3359	300	3	3	0.261	8.692	0.072	3	Medium	0.029
MelB	MELB	154	158	AGFVT	493.2536	3.2999	3000	3	3	0.703	23.426	0.166	3	Medium	0.067
MelB	MELB	154	163	AGFVTAGITL	948.528	7.3982	0	8	0	0	0	n/a	1	Medium	0
MelB	MELB	154	163	AGFVTAGITL	948.528	7.4779	30	8	7.976	0.218	2.73	0.188	3	Medium	0.076
MelB	MELB	154	163	AGFVTAGITL	948.528	7.4365	300	8	8	0.312	3.897	0.245	3	Medium	0.099
MelB	MELB	154	163	AGFVTAGITL	948.528	7.4455	3000	8	8	1.383	17.286	0.448	3	Medium	0.18
MelB	MELB	154	168	AGFVTAGITLPFVSY	1541.813	9.773	0	12	0	0	0	n/a	1	High	0
MelB	MELB	154	168	AGFVTAGITLPFVSY	1541.813	9.766	30	12	11.956	0.29	2.418	0.305	3	High	0.123
MelB	MELB	154	168	AGFVTAGITLPFVSY	1541.813	9.7812	300	12	12	0.402	3.348	0.21	3	High	0.085
MelB	MELB	154	168	AGFVTAGITLPFVSY	1541.813	9.8228	3000	12	12	1.894	15.781	0.525	3	High	0.211
MelB	MELB	156	163	FVTAGITL	820.4695	6.7145	0	6	0	0	0	n/a	1	Medium	0
MelB	MELB	156	163	FVTAGITL	820.4695	6.7413	30	6	5.992	0.103	1.721	0.253	3	Medium	0.102
MelB	MELB	156	163	FVTAGITL	820.4695	6.7533	300	6	6	0.126	2.104	0.119	3	Medium	0.048
MelB	MELB	156	163	FVTAGITL	820.4695	6.7034	3000	6	6	0.951	15.855	0.417	3	Medium	0.168
MelB	MELB	156	168	FVTAGITLPFVSY	1413.7544	9.4696	0	10	0	0	0	n/a	1	High	0
MelB	MELB	156	168	FVTAGITLPFVSY	1413.7544	9.478	30	10	9.973	0.212	2.123	0.26	3	High	0.105
MelB	MELB	156	168	FVTAGITLPFVSY	1413.7544	9.4358	300	10	10	0.273	2.732	0.103	3	High	0.042
MelB	MELB	156	168	FVTAGITLPFVSY	1413.7544	9.4872	3000	10	10	1.455	14.546	0.591	3	Medium	0.238
MelB	MELB	157	168	VTAGITLPFVSY	1266.686	8.6714	0	9	0	0	0	n/a	1	Medium	0
MelB	MELB	157	168	VTAGITLPFVSY	1266.686	8.6818	30	9	8.973	0.159	1.761	0.076	3	Medium	0.031
MelB	MELB	157	168	VTAGITLPFVSY	1266.686	8.6835	300	9	9	0.221	2.453	0.103	3	Medium	0.041
MelB	MELB	157	168	VTAGITLPFVSY	1266.686	8.6893	3000	9	9	0.867	9.636	0.576	3	Medium	0.232
MelB	MELB	159	168	AGITLPFVSY	1066.5699	8.6754	0	7	0	0	0	n/a	1	High	0
MelB	MELB	159	168	AGITLPFVSY	1066.5699	8.6484	30	7	6.973	0.114	1.633	0.13	3	High	0.053
MelB	MELB	159	168	AGITLPFVSY	1066.5699	8.642	300	7	7	0.137	1.957	0.017	3	High	0.007
MelB	MELB	159	168	AGITLPFVSY	1066.5699	8.655	3000	7	7	0.614	8.775	0.25	3	Medium	0.101
MelB	MELB	161	168	ITLPFVSY	938.5113	8.3922	0	5	0	0	0	n/a	1	High	0
MelB	MELB	161	168	ITLPFVSY	938.5113	8.4029	30	5	4.98	0.099	1.981	0.037	3	High	0.015
MelB	MELB	161	168	ITLPFVSY	938.5113	8.3936	300	5	5	0.106	2.118	0.016	3	High	0.007
MelB	MELB	161	168	ITLPFVSY	938.5113	8.3967	3000	5	5	0.43	8.61	0.202	3	High	0.081
MelB	MELB	169	180	VGGADRGFGFQM	1240.5659	6.4362	0	10	0	0	0	n/a	1	Medium	0
MelB	MELB	169	180	VGGADRGFGFQM	1240.5659	6.4875	30	10	10	0.157	1.574	0.188	3	Medium	0.076
MelB	MELB	169	180	VGGADRGFGFQM	1240.5659	6.4677	300	10	10	0.226	2.26	0.216	3	Medium	0.087
MelB	MELB	169	180	VGGADRGFGFQM	1240.5659	6.4626	3000	10	10	0.241	2.405	0.264	3	Medium	0.106
MelB	MELB	171	180	GADRGFGFQM	1084.476	6.3254	0	8	0	0	0	n/a	1	Medium	0
MelB	MELB	171	180	GADRGFGFQM	1084.476	6.3713	30	8	8	0.013	0.163	0.031	3	Medium	0.012
MelB	MELB	171	180	GADRGFGFQM	1084.476	6.3336	300	8	8	0.021	0.266	0.11	3	Medium	0.044
MelB	MELB	171	180	GADRGFGFQM	1084.476	6.3399	3000	8	8	0.053	0.668	0.035	3	Medium	0.014
MelB	MELB	174	180	RGFGFQM	841.3905	6.3359	0	5	0	0	0	n/a	1	High	0
MelB	MELB	174	180	RGFGFQM	841.3905	6.3993	30	5	5	0.036	0.718	0.026	3	High	0.01
MelB	MELB	174	180	RGFGFQM	841.3905	6.4003	300	5	5	0.027	0.544	0.037	3	Medium	0.015
MelB	MELB	174	180	RGFGFQM	841.3905	6.4164	3000	5	5	0.053	1.064	0.022	3	Medium	0.009
MelB	MELB	192	199	STIVTLRN	902.5185	2.5802	0	6	0	0	0	n/a	1	Medium	0
MelB	MELB	192	199	STIVTLRN	902.5185	2.6223	30	6	5.871	0.023	0.379	0.036	3	Medium	0.015
MelB	MELB	192	199	STIVTLRN	902.5185	2.6105	300	6	6	0.052	0.872	0.09	3	Medium	0.036
MelB	MELB	192	199	STIVTLRN	902.5185	2.6456	3000	6	6	0.043	0.711	0.03	3	Medium	0.012
MelB	MELB	192	203	STIVTLRNVHEV	1366.7569	3.8015	0	10	0	0	0	n/a	1	Medium	0
MelB	MELB	192	203	STIVTLRNVHEV	1366.7569	3.8361	30	10	9.792	0.095	0.949	0.116	3	High	0.047
MelB	MELB	192	203	STIVTLRNVHEV	1366.7569	3.8281	300	10	10	0.143	1.432	0.167	3	High	0.067
MelB	MELB	192	203	STIVTLRNVHEV	1366.7569	3.8585	3000	10	10	0.24	2.397	0.23	3	Medium	0.093
MelB	MELB	194	198	IVTLR	600.3959	2.2323	0	3	0	0	0	n/a	1	Medium	0
MelB	MELB	194	198	IVTLR	600.3959	2.2425	30	3	2.999	0.035	1.175	0.013	3	Medium	0.005
MelB	MELB	194	198	IVTLR	600.3959	2.2324	300	3	3	0.041	1.366	0.018	3	Medium	0.007
MelB	MELB	194	198	IVTLR	600.3959	2.2661	3000	3	3	0.04	1.332	0.035	3	Medium	0.014
MelB	MELB	194	199	IVTLRN	714.4388	1.9907	0	4	0	0	0	n/a	1	Medium	0
MelB	MELB	194	199	IVTLRN	714.4388	1.9864	30	4	3.999	0.031	0.769	0.053	3	Medium	0.021
MelB	MELB	194	199	IVTLRN	714.4388	1.986	300	4	4	0.03	0.74	0.034	3	Medium	0.014
MelB	MELB	194	199	IVTLRN	714.4388	2.0149	3000	4	4	0.067	1.687	0.055	3	Medium	0.022
MelB	MELB	194	200	IVTLRNV	813.5072	3.857	0	5	0	0	0	n/a	1	Medium	0
MelB	MELB	194	200	IVTLRNV	813.5072	3.891	30	5	4.999	0.095	1.903	0.058	3	Medium	0.023
MelB	MELB	194	200	IVTLRNV	813.5072	3.8708	300	5	5	0.127	2.539	0.11	3	Medium	0.044
MelB	MELB	194	200	IVTLRNV	813.5072	3.8836	3000	5	5	0.229	4.584	0.264	3	Medium	0.106
MelB	MELB	194	201	IVTLRNVH	950.5661	2.106	0	6	0	0	0	n/a	1	Medium	0
MelB	MELB	194	201	IVTLRNVH	950.5661	2.1277	30	6	5.999	0.057	0.951	0.057	3	Medium	0.023
MelB	MELB	194	201	IVTLRNVH	950.5661	2.1261	300	6	6	0.065	1.081	0.044	3	Medium	0.018
MelB	MELB	194	201	IVTLRNVH	950.5661	2.1644	3000	6	6	0.046	0.77	0.102	3	Medium	0.041
MelB	MELB	194	203	IVTLRNVHEV	1178.6772	3.3284	0	8	0	0	0	n/a	1	Medium	0
MelB	MELB	194	203	IVTLRNVHEV	1178.6772	3.3578	30	8	7.921	0.037	0.467	0.056	3	Medium	0.022
MelB	MELB	194	203	IVTLRNVHEV	1178.6772	3.35	300	8	8	0.095	1.19	0.067	3	Medium	0.027
MelB	MELB	194	203	IVTLRNVHEV	1178.6772	3.3588	3000	8	8	0.205	2.562	0.13	3	Medium	0.052
MelB	MELB	194	204	IVTLRNVHEVY	1341.7405	4.0025	0	9	0	0	0	n/a	1	Medium	0
MelB	MELB	194	204	IVTLRNVHEVY	1341.7405	4.0378	30	9	8.92	0.165	1.831	0.206	3	Medium	0.083
MelB	MELB	194	204	IVTLRNVHEVY	1341.7405	4.0235	300	9	9	0.264	2.936	0.235	3	Medium	0.095
MelB	MELB	194	204	IVTLRNVHEVY	1341.7405	4.0514	3000	9	9	0.392	4.357	0.423	3	Medium	0.17
MelB	MELB	212	225	AGRPHLTLKTIVGL	1474.8984	5.6062	0	11	0	0	0	n/a	1	Medium	0
MelB	MELB	212	225	AGRPHLTLKTIVGL	1474.8984	5.6437	30	11	10.87	1.316	11.962	1.722	3	Medium	0.693
MelB	MELB	212	225	AGRPHLTLKTIVGL	1474.8984	5.646	300	11	11	1.347	12.247	1.813	3	Medium	0.73
MelB	MELB	212	225	AGRPHLTLKTIVGL	1474.8984	5.6485	3000	11	11	2.232	20.287	1.654	3	Medium	0.666
MelB	MELB	219	225	LKTIVGL	742.4953	4.9253	0	5	0	0	0	n/a	1	High	0
MelB	MELB	219	225	LKTIVGL	742.4953	4.9406	30	5	4.87	0.586	11.713	0.089	3	Medium	0.036
MelB	MELB	219	225	LKTIVGL	742.4953	4.9131	300	5	5	0.995	19.896	0.228	3	Medium	0.092
MelB	MELB	219	225	LKTIVGL	742.4953	4.9791	3000	5	5	1.836	36.714	0.178	3	Medium	0.072
MelB	MELB	219	227	LKTIVGLIY	1018.6427	7.3186	0	7	0	0	0	n/a	1	High	0
MelB	MELB	219	227	LKTIVGLIY	1018.6427	7.3271	30	7	6.738	0.413	5.901	0.153	3	Medium	0.062
MelB	MELB	219	227	LKTIVGLIY	1018.6427	7.3154	300	7	7	0.771	11.016	0.399	3	Medium	0.161
MelB	MELB	219	227	LKTIVGLIY	1018.6427	7.2953	3000	7	7	2.358	33.681	0.11	3	Medium	0.044
MelB	MELB	220	225	KTIVGL	629.4112	3.6879	0	4	0	0	0	n/a	1	Medium	0
MelB	MELB	220	225	KTIVGL	629.4112	3.783	30	4	3.87	0.178	4.448	0.196	3	Medium	0.079
MelB	MELB	220	225	KTIVGL	629.4112	3.7517	300	4	4	0.573	14.328	0.205	3	Medium	0.083
MelB	MELB	220	225	KTIVGL	629.4112	3.803	3000	4	4	1.455	36.377	0.191	3	Medium	0.077
MelB	MELB	220	227	KTIVGLIY	905.5586	6.1836	0	6	0	0	0	n/a	1	Medium	0
MelB	MELB	220	227	KTIVGLIY	905.5586	6.1731	30	6	5.738	0.142	2.374	0.048	3	Medium	0.019
MelB	MELB	220	227	KTIVGLIY	905.5586	6.1647	300	6	6	0.513	8.544	0.225	3	Medium	0.091
MelB	MELB	220	227	KTIVGLIY	905.5586	6.1886	3000	6	6	1.261	21.01	0.225	3	Medium	0.091
MelB	MELB	221	225	TIVGL	501.3162	5.0196	0	3	0	0	0	n/a	1	High	0
MelB	MELB	221	225	TIVGL	501.3162	5.0413	30	3	2.875	0.13	4.32	0.194	3	High	0.078
MelB	MELB	221	225	TIVGL	501.3162	5.023	300	3	3	0.342	11.389	0.112	3	High	0.045
MelB	MELB	221	225	TIVGL	501.3162	5.0447	3000	3	3	1.121	37.362	0.216	3	Medium	0.087
MelB	MELB	222	227	IVGLIY	676.416	6.8245	0	4	0	0	0	n/a	1	Medium	0
MelB	MELB	222	227	IVGLIY	676.416	6.8998	30	4	3.867	0.108	2.694	0.053	3	Medium	0.021
MelB	MELB	222	227	IVGLIY	676.416	6.8934	300	4	4	0.299	7.483	0.138	3	Medium	0.055
MelB	MELB	222	227	IVGLIY	676.416	6.8849	3000	4	4	0.852	21.304	0.301	3	Medium	0.121
MelB	MELB	226	232	IYKNDQL	892.4654	2.5643	0	5	0	0	0	n/a	1	High	0
MelB	MELB	226	232	IYKNDQL	892.4654	2.5835	30	5	4.999	0.257	5.135	0.103	3	Medium	0.042
MelB	MELB	226	232	IYKNDQL	892.4654	2.5628	300	5	5	0.477	9.546	0.172	3	Medium	0.069
MelB	MELB	226	232	IYKNDQL	892.4654	2.5851	3000	5	5	1.068	21.364	0.574	3	Medium	0.231
MelB	MELB	226	235	IYKNDQLSCL	1195.5907	5.1707	0	8	0	0	0	n/a	1	Medium	0
MelB	MELB	226	235	IYKNDQLSCL	1195.5907	5.1813	30	8	7.999	0.198	2.475	0.58	3	Medium	0.233
MelB	MELB	226	235	IYKNDQLSCL	1195.5907	5.1634	300	8	8	0.311	3.892	0.587	3	Medium	0.236
MelB	MELB	226	235	IYKNDQLSCL	1195.5907	5.1883	3000	8	8	0.683	8.541	0.706	3	Medium	0.284
MelB	MELB	243	253	NIASNIINGFA	1132.5877	8.4663	0	9	0	0	0	n/a	1	High	0
MelB	MELB	243	253	NIASNIINGFA	1132.5877	8.4719	30	9	8.858	0.013	0.143	0.04	3	High	0.016
MelB	MELB	243	253	NIASNIINGFA	1132.5877	8.4714	300	9	9	0.054	0.596	0.056	3	Medium	0.023
MelB	MELB	243	253	NIASNIINGFA	1132.5877	8.468	3000	9	9	0.146	1.624	0.183	3	Medium	0.074
MelB	MELB	244	253	IASNIINGFA	1018.5447	6.3727	0	8	0	0	0	n/a	1	Medium	0
MelB	MELB	244	253	IASNIINGFA	1018.5447	6.3959	30	8	7.858	0.006	0.073	0.017	3	Medium	0.007
MelB	MELB	244	253	IASNIINGFA	1018.5447	6.3968	300	8	8	0.054	0.673	0.115	3	Medium	0.046
MelB	MELB	244	253	IASNIINGFA	1018.5447	6.3877	3000	8	8	0.206	2.579	0.153	3	Medium	0.062
MelB	MELB	244	255	IASNIINGFAIY	1294.6921	8.3225	0	10	0	0	0	n/a	1	High	0
MelB	MELB	244	255	IASNIINGFAIY	1294.6921	8.3118	30	10	9.819	0.142	1.424	0.091	3	High	0.037
MelB	MELB	244	255	IASNIINGFAIY	1294.6921	8.2902	300	10	10	0.407	4.074	0.157	3	High	0.063
MelB	MELB	244	255	IASNIINGFAIY	1294.6921	8.3688	3000	10	10	0.89	8.905	0.063	3	Medium	0.025
MelB	MELB	246	255	SNIINGFAIY	1110.571	7.8929	0	8	0	0	0	n/a	1	High	0
MelB	MELB	246	255	SNIINGFAIY	1110.571	7.8936	30	8	7.819	0.123	1.533	0.087	3	Medium	0.035
MelB	MELB	246	255	SNIINGFAIY	1110.571	7.8823	300	8	8	0.417	5.218	0.103	3	Medium	0.041
MelB	MELB	246	255	SNIINGFAIY	1110.571	7.8895	3000	8	8	0.844	10.553	0.147	3	Medium	0.059
MelB	MELB	256	259	YFTY	592.2533	5.4807	0	2	0	0	0	n/a	1	Medium	0
MelB	MELB	256	259	YFTY	592.2533	5.505	30	2	2	0.016	0.806	0.029	3	Medium	0.012
MelB	MELB	256	259	YFTY	592.2533	5.4845	300	2	2	0.094	4.69	0.039	3	Medium	0.016
MelB	MELB	256	259	YFTY	592.2533	5.4872	3000	2	2	0.429	21.43	0.097	3	Medium	0.039
MelB	MELB	256	262	YFTYVIG	861.4273	6.9935	0	5	0	0	0	n/a	1	Medium	0
MelB	MELB	256	262	YFTYVIG	861.4273	6.9979	30	5	4.891	0.191	3.811	0.314	3	Medium	0.126
MelB	MELB	256	262	YFTYVIG	861.4273	6.9901	300	5	5	0.445	8.908	0.352	3	Medium	0.142
MelB	MELB	256	262	YFTYVIG	861.4273	6.9934	3000	5	5	1.275	25.491	0.096	3	Medium	0.038
MelB	MELB	260	267	VIGDADLF	848.428	7.2117	0	6	0	0	0	n/a	1	Medium	0
MelB	MELB	260	267	VIGDADLF	848.428	7.2059	30	6	5.956	0.468	7.808	0.586	3	Medium	0.236
MelB	MELB	260	267	VIGDADLF	848.428	7.2051	300	6	6	0.744	12.404	0.688	3	Medium	0.277
MelB	MELB	260	267	VIGDADLF	848.428	7.2289	3000	6	6	0.785	13.09	0.639	3	Medium	0.257
MelB	MELB	260	270	VIGDADLFPYY	1271.6074	8.8584	0	8	0	0	0	n/a	1	High	0
MelB	MELB	260	270	VIGDADLFPYY	1271.6074	8.8673	30	8	7.952	0.446	5.581	0.57	3	Medium	0.229
MelB	MELB	260	270	VIGDADLFPYY	1271.6074	8.8767	300	8	8	0.757	9.464	0.649	3	Medium	0.261
MelB	MELB	260	270	VIGDADLFPYY	1271.6074	8.8368	3000	8	8	0.976	12.206	0.631	3	Medium	0.254
MelB	MELB	263	270	DADLFPYY	1002.4335	8.2844	0	5	0	0	0	n/a	1	High	0
MelB	MELB	263	270	DADLFPYY	1002.4335	8.3026	30	5	4.952	0.146	2.912	0.199	3	High	0.08
MelB	MELB	263	270	DADLFPYY	1002.4335	8.2082	300	5	5	0.34	6.802	0.31	3	Medium	0.125
MelB	MELB	263	270	DADLFPYY	1002.4335	8.2996	3000	5	5	0.535	10.698	0.329	3	Medium	0.132
MelB	MELB	263	271	DADLFPYYL	1115.5175	9.7964	0	6	0	0	0	n/a	1	Medium	0
MelB	MELB	263	271	DADLFPYYL	1115.5175	9.8493	30	6	5.947	0.196	3.258	0.246	3	Medium	0.099
MelB	MELB	263	271	DADLFPYYL	1115.5175	9.8516	300	6	6	0.472	7.864	0.469	3	Medium	0.189
MelB	MELB	263	271	DADLFPYYL	1115.5175	9.8389	3000	6	6	0.895	14.925	0.463	3	Medium	0.186
MelB	MELB	263	273	DADLFPYYLSY	1365.6129	9.6446	0	8	0	0	0	n/a	1	High	0
MelB	MELB	263	273	DADLFPYYLSY	1365.6129	9.6449	30	8	7.947	0.248	3.097	0.313	3	High	0.126
MelB	MELB	263	273	DADLFPYYLSY	1365.6129	9.6268	300	8	8	0.698	8.723	0.648	3	Medium	0.261
MelB	MELB	263	273	DADLFPYYLSY	1365.6129	9.6254	3000	8	8	1.52	18.998	0.822	3	Medium	0.331
MelB	MELB	273	282	YAGAANLLTL	1005.5495	7.7379	0	8	0	0	0	n/a	1	High	0
MelB	MELB	273	282	YAGAANLLTL	1005.5495	7.6834	30	8	7.946	0.4	5.004	0.127	3	Medium	0.051
MelB	MELB	273	282	YAGAANLLTL	1005.5495	7.7368	300	8	8	0.621	7.761	0.108	3	Medium	0.043
MelB	MELB	273	282	YAGAANLLTL	1005.5495	7.7347	3000	8	8	0.994	12.43	0.271	3	Medium	0.109
MelB	MELB	274	282	AGAANLLTL	842.4862	7.1053	0	7	0	0	0	n/a	1	High	0
MelB	MELB	274	282	AGAANLLTL	842.4862	7.1547	30	7	6.946	0.169	2.412	0.013	3	High	0.005
MelB	MELB	274	282	AGAANLLTL	842.4862	7.1126	300	7	7	0.353	5.045	0.084	3	Medium	0.034
MelB	MELB	274	282	AGAANLLTL	842.4862	7.1526	3000	7	7	0.648	9.257	0.26	3	High	0.105
MelB	MELB	281	288	TLIVFPRL	957.6011	7.9472	0	5	0	0	0	n/a	1	High	0
MelB	MELB	281	288	TLIVFPRL	957.6011	7.9718	30	5	4.747	0.174	3.485	0.035	3	High	0.014
MelB	MELB	281	288	TLIVFPRL	957.6011	7.9591	300	5	5	0.403	8.05	0.099	3	High	0.04
MelB	MELB	281	288	TLIVFPRL	957.6011	7.9838	3000	5	5	0.502	10.033	0.165	3	High	0.067
MelB	MELB	282	288	LIVFPRL	856.5535	7.7166	0	4	0	0	0	n/a	1	Medium	0
MelB	MELB	282	288	LIVFPRL	856.5535	7.7125	30	4	3.875	0.166	4.155	0.058	3	Medium	0.023
MelB	MELB	282	288	LIVFPRL	856.5535	7.7257	300	4	4	0.383	9.585	0.139	3	Medium	0.056
MelB	MELB	282	288	LIVFPRL	856.5535	7.713	3000	4	4	0.639	15.964	0.257	3	Medium	0.104
MelB	MELB	283	288	IVFPRL	743.4694	6.7485	0	3	0	0	0	n/a	1	Medium	0
MelB	MELB	283	288	IVFPRL	743.4694	6.7549	30	3	2.999	0.166	5.528	0.024	3	High	0.01
MelB	MELB	283	288	IVFPRL	743.4694	6.7393	300	3	3	0.403	13.421	0.112	3	High	0.045
MelB	MELB	283	288	IVFPRL	743.4694	6.7327	3000	3	3	0.539	17.979	0.214	3	High	0.086
MelB	MELB	283	290	IVFPRLVK	970.6328	4.2203	0	5	0	0	0	n/a	1	Medium	0
MelB	MELB	283	290	IVFPRLVK	970.6328	4.2031	30	5	4.887	0.338	6.751	0.074	3	Medium	0.03
MelB	MELB	283	290	IVFPRLVK	970.6328	4.1941	300	5	5	0.819	16.371	0.082	3	Medium	0.033
MelB	MELB	283	290	IVFPRLVK	970.6328	4.2552	3000	5	5	1.13	22.594	0.25	3	Medium	0.1
MelB	MELB	291	297	MLSRRIL	887.5375	3.0616	0	5	0	0	0	n/a	1	Medium	0
MelB	MELB	291	297	MLSRRIL	887.5375	3.1086	30	5	4.935	0.754	15.077	0.151	3	Medium	0.061
MelB	MELB	291	297	MLSRRIL	887.5375	3.086	300	5	5	1.034	20.673	0.231	3	Medium	0.093
MelB	MELB	291	297	MLSRRIL	887.5375	3.0952	3000	5	5	1.265	25.292	0.653	3	Medium	0.263
MelB	MELB	292	297	LSRRIL	756.497	2.2905	0	4	0	0	0	n/a	1	Medium	0
MelB	MELB	292	297	LSRRIL	756.497	2.2937	30	4	3.935	0.682	17.042	0.19	3	Medium	0.077
MelB	MELB	292	297	LSRRIL	756.497	2.294	300	4	4	0.792	19.79	0.227	3	Medium	0.091
MelB	MELB	292	297	LSRRIL	756.497	2.3567	3000	4	4	0.984	24.59	0.46	3	Medium	0.185
MelB	MELB	295	301	RILWAGA	785.4548	5.3332	0	5	0	0	0	n/a	1	Medium	0
MelB	MELB	295	301	RILWAGA	785.4548	5.4007	30	5	4.925	0.078	1.566	0.015	3	Medium	0.006
MelB	MELB	295	301	RILWAGA	785.4548	5.38	300	5	5	0.134	2.681	0.037	3	Medium	0.015
MelB	MELB	295	301	RILWAGA	785.4548	5.4193	3000	5	5	0.136	2.717	0.045	3	Medium	0.018
MelB	MELB	295	304	RILWAGASVM	1102.5957	6.6887	0	8	0	0	0	n/a	1	Medium	0
MelB	MELB	295	304	RILWAGASVM	1102.5957	6.6977	30	8	7.924	0.153	1.913	0.113	3	Medium	0.045
MelB	MELB	295	304	RILWAGASVM	1102.5957	6.696	300	8	8	0.118	1.479	0.243	3	Medium	0.098
MelB	MELB	295	304	RILWAGASVM	1102.5957	6.652	3000	8	8	0.249	3.109	0.045	3	Medium	0.018
MelB	MELB	298	301	WAGA	403.1856	2.7176	0	2	0	0	0	n/a	1	Medium	0
MelB	MELB	298	301	WAGA	403.1856	2.7708	30	2	2	0.019	0.934	0.026	3	Medium	0.01
MelB	MELB	298	301	WAGA	403.1856	2.7258	300	2	2	0.028	1.395	0.01	3	Medium	0.004
MelB	MELB	298	301	WAGA	403.1856	2.7436	3000	2	2	0.053	2.637	0.035	3	Medium	0.014
MelB	MELB	298	304	WAGASVM	720.3265	5.1137	0	5	0	0	0	n/a	1	High	0
MelB	MELB	298	304	WAGASVM	720.3265	5.1624	30	5	4.999	0.076	1.512	0.055	3	High	0.022
MelB	MELB	298	304	WAGASVM	720.3265	5.1378	300	5	5	0.089	1.782	0.028	3	High	0.011
MelB	MELB	298	304	WAGASVM	720.3265	5.1829	3000	5	5	0.106	2.12	0.102	3	High	0.041
MelB	MELB	298	307	WAGASVMPVL	1029.5317	7.8931	0	7	0	0	0	n/a	1	Medium	0
MelB	MELB	298	307	WAGASVMPVL	1029.5317	7.9118	30	7	6.837	0.142	2.027	0.133	3	Medium	0.053
MelB	MELB	298	307	WAGASVMPVL	1029.5317	7.8952	300	7	7	0.162	2.308	0.045	3	Medium	0.018
MelB	MELB	298	307	WAGASVMPVL	1029.5317	7.9173	3000	7	7	0.073	1.044	0.073	3	Medium	0.03
MelB	MELB	302	307	SVMPVL	644.3567	5.9274	0	3	0	0	0	n/a	1	Medium	0
MelB	MELB	302	307	SVMPVL	644.3567	6.0244	30	3	2.838	0.02	0.68	0.011	3	Medium	0.005
MelB	MELB	302	307	SVMPVL	644.3567	5.995	300	3	3	0.026	0.876	0.027	3	Medium	0.011
MelB	MELB	302	307	SVMPVL	644.3567	6.0025	3000	3	3	0.025	0.849	0.031	3	Medium	0.012
MelB	MELB	308	312	SCAGL	449.1944	2.9081	0	3	0	0	0	n/a	1	Medium	0
MelB	MELB	308	312	SCAGL	449.1944	2.9583	30	3	2.999	0.005	0.174	0.006	3	Medium	0.002
MelB	MELB	308	312	SCAGL	449.1944	2.9227	300	3	3	0.009	0.295	0.014	3	Medium	0.005
MelB	MELB	308	312	SCAGL	449.1944	2.9633	3000	3	3	0.007	0.226	0.011	3	Medium	0.004
MelB	MELB	313	316	FAMA	438.1937	3.6825	0	2	0	0	0	n/a	1	High	0
MelB	MELB	313	316	FAMA	438.1937	3.7017	30	2	2	0.009	0.468	0.009	3	Medium	0.003
MelB	MELB	313	316	FAMA	438.1937	3.6967	300	2	2	0.022	1.103	0.012	3	High	0.005
MelB	MELB	313	316	FAMA	438.1937	3.6979	3000	2	2	0.05	2.512	0.001	3	Medium	0
MelB	MELB	316	321	ALADIH	638.3388	2.1591	0	4	0	0	0	n/a	1	Medium	0
MelB	MELB	316	321	ALADIH	638.3388	2.1647	30	4	3.892	0.274	6.852	0.158	3	Medium	0.064
MelB	MELB	316	321	ALADIH	638.3388	2.1491	300	4	4	0.538	13.462	0.25	3	Medium	0.101
MelB	MELB	316	321	ALADIH	638.3388	2.1519	3000	4	4	0.982	24.553	0.343	3	Medium	0.138
MelB	MELB	316	325	ALADIHNAAL	1007.54	4.1419	0	8	0	0	0	n/a	1	Medium	0
MelB	MELB	316	325	ALADIHNAAL	1007.54	4.1558	30	8	7.883	0.605	7.568	0.526	3	Medium	0.212
MelB	MELB	316	325	ALADIHNAAL	1007.54	4.1452	300	8	8	1.112	13.903	0.574	3	Medium	0.231
MelB	MELB	316	325	ALADIHNAAL	1007.54	4.1667	3000	8	8	1.569	19.614	0.468	3	Medium	0.188
MelB	MELB	317	323	LADIHNA	752.3817	1.8801	0	5	0	0	0	n/a	1	High	0
MelB	MELB	317	323	LADIHNA	752.3817	1.8949	30	5	4.892	0.479	9.577	0.353	3	Medium	0.142
MelB	MELB	317	323	LADIHNA	752.3817	1.8888	300	5	5	0.671	13.421	0.299	3	Medium	0.12
MelB	MELB	317	323	LADIHNA	752.3817	1.9317	3000	5	5	0.883	17.663	0.533	3	Medium	0.215
MelB	MELB	317	325	LADIHNAAL	936.5029	3.577	0	7	0	0	0	n/a	1	High	0
MelB	MELB	317	325	LADIHNAAL	936.5029	3.6028	30	7	6.883	0.478	6.828	0.295	3	Medium	0.119
MelB	MELB	317	325	LADIHNAAL	936.5029	3.5904	300	7	7	0.854	12.207	0.309	3	Medium	0.124
MelB	MELB	317	325	LADIHNAAL	936.5029	3.607	3000	7	7	1.18	16.859	0.467	3	Medium	0.188
MelB	MELB	322	328	NAALIVA	670.4014	4.0157	0	5	0	0	0	n/a	1	Medium	0
MelB	MELB	322	328	NAALIVA	670.4014	4.0396	30	5	4.739	0.019	0.385	0.085	3	Medium	0.034
MelB	MELB	322	328	NAALIVA	670.4014	4.02	300	5	5	0.152	3.042	0.172	3	Medium	0.069
MelB	MELB	322	328	NAALIVA	670.4014	4.0461	3000	5	5	0.237	4.749	0.012	3	Medium	0.005
MelB	MELB	325	332	LIVAAGIF	802.4953	8.06	0	6	0	0	0	n/a	1	Medium	0
MelB	MELB	325	332	LIVAAGIF	802.4953	8.0442	30	6	5.867	0.005	0.078	0.044	3	Medium	0.018
MelB	MELB	325	332	LIVAAGIF	802.4953	8.0587	300	6	6	0.03	0.506	0.033	3	Medium	0.013
MelB	MELB	325	332	LIVAAGIF	802.4953	8.0741	3000	6	6	0.081	1.358	0.055	3	Medium	0.022
MelB	MELB	326	334	IVAAGIFLN	916.5382	6.9354	0	7	0	0	0	n/a	1	Medium	0
MelB	MELB	326	334	IVAAGIFLN	916.5382	6.9675	30	7	6.986	0.014	0.198	0.044	3	Medium	0.018
MelB	MELB	326	334	IVAAGIFLN	916.5382	6.9597	300	7	7	0.041	0.587	0.161	3	Medium	0.065
MelB	MELB	326	334	IVAAGIFLN	916.5382	6.9375	3000	7	7	0.032	0.464	0.077	3	Medium	0.031
MelB	MELB	329	334	AGIFLN	633.3486	5.8825	0	4	0	0	0	n/a	1	High	0
MelB	MELB	329	334	AGIFLN	633.3486	5.9117	30	4	3.986	0.028	0.694	0.011	3	High	0.004
MelB	MELB	329	334	AGIFLN	633.3486	5.8834	300	4	4	0.039	0.964	0.014	3	Medium	0.005
MelB	MELB	329	334	AGIFLN	633.3486	5.9173	3000	4	4	0.02	0.509	0.016	3	High	0.007
MelB	MELB	333	339	LNIGTAL	700.4119	5.5974	0	5	0	0	0	n/a	1	Medium	0
MelB	MELB	333	339	LNIGTAL	700.4119	5.5923	30	5	4.99	0.001	0.023	0.011	3	Medium	0.005
MelB	MELB	333	339	LNIGTAL	700.4119	5.5856	300	5	5	0.012	0.231	0.005	3	Medium	0.002
MelB	MELB	333	339	LNIGTAL	700.4119	5.6037	3000	5	5	0.015	0.31	0.014	3	Medium	0.006
MelB	MELB	348	358	VADTVDYGEFK	1242.5768	4.2203	0	9	0	0	0	n/a	1	High	0
MelB	MELB	348	358	VADTVDYGEFK	1242.5768	4.2386	30	9	8.994	0.119	1.318	0.082	3	High	0.033
MelB	MELB	348	358	VADTVDYGEFK	1242.5768	4.2189	300	9	9	0.212	2.359	0.161	3	High	0.065
MelB	MELB	348	358	VADTVDYGEFK	1242.5768	4.2302	3000	9	9	0.383	4.259	0.416	3	Medium	0.167
MelB	MELB	350	358	DTVDYGEFK	1072.4713	3.984	0	7	0	0	0	n/a	1	Medium	0
MelB	MELB	350	358	DTVDYGEFK	1072.4713	3.9865	30	7	6.994	0.069	0.987	0.093	3	Medium	0.038
MelB	MELB	350	358	DTVDYGEFK	1072.4713	3.9648	300	7	7	0.141	2.009	0.145	3	Medium	0.058
MelB	MELB	350	358	DTVDYGEFK	1072.4713	3.9551	3000	7	7	0.32	4.567	0.332	3	Medium	0.134
MelB	MELB	363	367	CESIA	521.2155	2.0535	0	3	0	0	0	n/a	1	High	0
MelB	MELB	363	367	CESIA	521.2155	2.0641	30	3	2.999	0.811	27.043	0.399	3	Medium	0.161
MelB	MELB	363	367	CESIA	521.2155	2.0605	300	3	3	1.073	35.779	0.314	3	Medium	0.126
MelB	MELB	363	367	CESIA	521.2155	2.0843	3000	3	3	1.262	42.082	0.533	3	Medium	0.215
MelB	MELB	372	383	TMVVKGGSAFAA	1137.5852	3.4671	0	10	0	0	0	n/a	1	Medium	0
MelB	MELB	372	383	TMVVKGGSAFAA	1137.5852	3.5339	30	10	9.913	0.108	1.084	0.053	3	Medium	0.021
MelB	MELB	372	383	TMVVKGGSAFAA	1137.5852	3.5143	300	10	10	0.146	1.46	0.01	3	Medium	0.004
MelB	MELB	372	383	TMVVKGGSAFAA	1137.5852	3.5273	3000	10	10	0.174	1.744	0.039	3	Medium	0.016
MelB	MELB	374	383	VVKGGSAFAA	905.4971	2.4117	0	8	0	0	0	n/a	1	Medium	0
MelB	MELB	374	383	VVKGGSAFAA	905.4971	2.4617	30	8	8	0.075	0.939	0.017	3	Medium	0.007
MelB	MELB	374	383	VVKGGSAFAA	905.4971	2.4373	300	8	8	0.129	1.614	0.052	3	Medium	0.021
MelB	MELB	374	383	VVKGGSAFAA	905.4971	2.4763	3000	8	8	0.158	1.974	0.079	3	Medium	0.032
MelB	MELB	381	385	FAAFF	601.29	8.7933	0	3	0	0	0	n/a	1	Medium	0
MelB	MELB	381	385	FAAFF	601.29	8.7873	30	3	3	0.039	1.309	0.045	3	Medium	0.018
MelB	MELB	381	385	FAAFF	601.29	8.7762	300	3	3	0.102	3.403	0.058	3	Medium	0.023
MelB	MELB	381	385	FAAFF	601.29	8.7865	3000	3	3	0.152	5.069	0.061	3	Medium	0.025
MelB	MELB	382	387	AAFFIA	638.3428	7.3079	0	4	0	0	0	n/a	1	Medium	0
MelB	MELB	382	387	AAFFIA	638.3428	7.3041	30	4	3.979	0.005	0.119	0.015	3	Medium	0.006
MelB	MELB	382	387	AAFFIA	638.3428	7.3278	300	4	4	0.034	0.858	0.059	3	Medium	0.024
MelB	MELB	382	387	AAFFIA	638.3428	7.3353	3000	4	4	0.026	0.659	0.029	3	Medium	0.011
MelB	MELB	388	392	LVLGL	513.3526	7.1106	0	3	0	0	0	n/a	1	Medium	0
MelB	MELB	388	392	LVLGL	513.3526	7.1724	30	3	2.967	0.033	1.104	0.034	3	Medium	0.014
MelB	MELB	388	392	LVLGL	513.3526	7.1196	300	3	3	0.158	5.268	0.117	3	Medium	0.047
MelB	MELB	388	392	LVLGL	513.3526	7.1308	3000	3	3	0.346	11.521	0.239	3	Medium	0.096
MelB	MELB	388	400	LVLGLIGYTPNVA	1328.7704	8.3017	0	10	0	0	0	n/a	1	Medium	0
MelB	MELB	388	400	LVLGLIGYTPNVA	1328.7704	8.301	30	10	9.838	0.185	1.85	0.345	3	Medium	0.139
MelB	MELB	388	400	LVLGLIGYTPNVA	1328.7704	8.2992	300	10	10	0.473	4.734	0.68	3	Medium	0.274
MelB	MELB	388	400	LVLGLIGYTPNVA	1328.7704	8.2939	3000	10	10	0.731	7.308	0.263	3	Medium	0.106
MelB	MELB	391	406	GLIGYTPNVAQSAQTL	1631.8519	6.1677	0	13	0	0	0	n/a	1	Medium	0
MelB	MELB	391	406	GLIGYTPNVAQSAQTL	1631.8519	6.166	30	13	12.87	0.389	2.996	0.915	3	Medium	0.369
MelB	MELB	391	406	GLIGYTPNVAQSAQTL	1631.8519	6.1488	300	13	13	0.71	5.462	1.264	3	Medium	0.509
MelB	MELB	391	406	GLIGYTPNVAQSAQTL	1631.8519	6.1709	3000	13	13	0.668	5.141	0.504	3	Medium	0.203
MelB	MELB	393	404	IGYTPNVAQSAQ	1247.6146	3.0087	0	9	0	0	0	n/a	1	High	0
MelB	MELB	393	404	IGYTPNVAQSAQ	1247.6146	3.0308	30	9	8.999	0.193	2.148	0.483	3	High	0.194
MelB	MELB	393	404	IGYTPNVAQSAQ	1247.6146	3.0203	300	9	9	0.306	3.397	0.675	3	High	0.272
MelB	MELB	393	404	IGYTPNVAQSAQ	1247.6146	3.0363	3000	9	9	0.161	1.793	0.269	3	Medium	0.108
MelB	MELB	405	413	TLQGMQFIM	1067.5144	8.3546	0	7	0	0	0	n/a	1	Medium	0
MelB	MELB	405	413	TLQGMQFIM	1067.5144	8.3679	30	7	6.979	0.042	0.604	0.085	3	Medium	0.034
MelB	MELB	405	413	TLQGMQFIM	1067.5144	8.3533	300	7	7	0.133	1.897	0.198	3	Medium	0.08
MelB	MELB	405	413	TLQGMQFIM	1067.5144	8.3469	3000	7	7	0.128	1.826	0.195	3	Medium	0.078
MelB	MELB	407	413	QGMQFIM	853.3826	7.5869	0	5	0	0	0	n/a	1	Medium	0
MelB	MELB	407	413	QGMQFIM	853.3826	7.5762	30	5	4.979	0.005	0.103	0.023	3	High	0.009
MelB	MELB	407	413	QGMQFIM	853.3826	7.5799	300	5	5	0.074	1.476	0.045	3	High	0.018
MelB	MELB	407	413	QGMQFIM	853.3826	7.6061	3000	5	5	0.164	3.287	0.132	3	High	0.053
MelB	MELB	412	416	IMIVL	587.3717	7.7963	0	3	0	0	0	n/a	1	Medium	0
MelB	MELB	412	416	IMIVL	587.3717	7.8144	30	3	2.83	0	-0.011	0.01	3	Medium	0.004
MelB	MELB	412	416	IMIVL	587.3717	7.8044	300	3	3	-0.002	-0.052	0.029	3	Medium	0.012
MelB	MELB	412	416	IMIVL	587.3717	7.7941	3000	3	3	0.006	0.214	0.06	3	Medium	0.024
MelB	MELB	423	427	MTLVL	575.3353	7.1585	0	3	0	0	0	n/a	1	Medium	0
MelB	MELB	423	427	MTLVL	575.3353	7.1243	30	3	2.855	0.016	0.533	0.063	3	Medium	0.025
MelB	MELB	423	427	MTLVL	575.3353	7.1591	300	3	3	0.011	0.355	0.012	3	Medium	0.005
MelB	MELB	423	427	MTLVL	575.3353	7.142	3000	3	3	0.014	0.472	0.086	3	Medium	0.035
MelB	MELB	426	430	VLYFR	696.3959	4.5932	0	3	0	0	0	n/a	1	High	0
MelB	MELB	426	430	VLYFR	696.3959	4.5741	30	3	2.997	0.026	0.852	0.054	3	Medium	0.022
MelB	MELB	426	430	VLYFR	696.3959	4.5828	300	3	3	0.045	1.488	0.039	3	Medium	0.016
MelB	MELB	426	430	VLYFR	696.3959	4.6223	3000	3	3	0.051	1.696	0.023	3	High	0.009
MelB	MELB	426	431	VLYFRY	859.4592	6.2202	0	4	0	0	0	n/a	1	High	0
MelB	MELB	426	431	VLYFRY	859.4592	6.2327	30	4	3.997	0.008	0.193	0.002	3	High	0.001
MelB	MELB	426	431	VLYFRY	859.4592	6.2619	300	4	4	0.048	1.201	0.02	3	High	0.008
MelB	MELB	426	431	VLYFRY	859.4592	6.2784	3000	4	4	0.099	2.469	0.095	3	High	0.038
MelB	MELB	428	431	YFRY	647.3067	3.9999	0	2	0	0	0	n/a	1	High	0
MelB	MELB	428	431	YFRY	647.3067	4.0112	30	2	2	0.01	0.497	0.006	3	Medium	0.002
MelB	MELB	428	431	YFRY	647.3067	3.9862	300	2	2	0.037	1.827	0.029	3	Medium	0.012
MelB	MELB	428	431	YFRY	647.3067	4.0175	3000	2	2	0.036	1.818	0.058	3	Medium	0.023
MelB	MELB	431	434	YYRL	613.3224	3.9416	0	2	0	0	0	n/a	1	High	0
MelB	MELB	431	434	YYRL	613.3224	4.0361	30	2	2	-0.005	-0.23	0.036	3	High	0.014
MelB	MELB	431	434	YYRL	613.3224	4.004	300	2	2	0.025	1.25	0.041	3	High	0.017
MelB	MELB	431	434	YYRL	613.3224	4.0211	3000	2	2	0.031	1.55	0.069	3	Medium	0.028
MelB	MELB	438	443	MLRKIQ	787.4738	1.6841	0	4	0	0	0	n/a	1	Medium	0
MelB	MELB	438	443	MLRKIQ	787.4738	1.6767	30	4	3.988	0.573	14.316	0.564	3	Medium	0.227
MelB	MELB	438	443	MLRKIQ	787.4738	1.6638	300	4	4	1.113	27.824	0.309	3	Medium	0.124
MelB	MELB	438	443	MLRKIQ	787.4738	1.7314	3000	4	4	1.985	49.617	0.661	3	Medium	0.266
MelB	MELB	440	447	RKIQIHLL	1019.6604	4.1158	0	6	0	0	0	n/a	1	Medium	0
MelB	MELB	440	447	RKIQIHLL	1019.6604	4.092	30	6	5.929	0.367	6.125	0.224	3	Medium	0.09
MelB	MELB	440	447	RKIQIHLL	1019.6604	4.1045	300	6	6	0.819	13.655	0.436	3	Medium	0.175
MelB	MELB	440	447	RKIQIHLL	1019.6604	4.11	3000	6	6	2.588	43.134	0.477	3	Medium	0.192
MelB	MELB	448	466	DKYRKTPPFVEQPDSPAIS	2174.1008	3.3375	0	13	0	0	0	n/a	1	Medium	0
MelB	MELB	448	466	DKYRKTPPFVEQPDSPAIS	2174.1008	3.2517	30	13	12.945	7.788	59.904	0.83	3	Medium	0.334
MelB	MELB	448	466	DKYRKTPPFVEQPDSPAIS	2174.1008	3.2188	300	13	13	7.966	61.28	0.421	3	Medium	0.169
MelB	MELB	448	466	DKYRKTPPFVEQPDSPAIS	2174.1008	3.2325	3000	13	13	7.702	59.249	0.62	3	Medium	0.25
MelB	MELB	448	467	DKYRKTPPFVEQPDSPAISV	2273.1692	4.4323	0	14	0	0	0	n/a	1	Medium	0
MelB	MELB	448	467	DKYRKTPPFVEQPDSPAISV	2273.1692	4.4044	30	14	13.944	8.723	62.31	0.726	3	Medium	0.292
MelB	MELB	448	467	DKYRKTPPFVEQPDSPAISV	2273.1692	4.4733	300	14	14	8.79	62.786	0.262	3	Medium	0.105
MelB	MELB	448	467	DKYRKTPPFVEQPDSPAISV	2273.1692	4.3771	3000	14	14	8.656	61.83	0.591	3	Medium	0.238
MelB	MELB	448	468	DKYRKTPPFVEQPDSPAISVV	2372.2376	4.7862	0	15	0	0	0	n/a	1	High	0
MelB	MELB	448	468	DKYRKTPPFVEQPDSPAISVV	2372.2376	4.7353	30	15	14.868	9.545	63.635	0.863	3	High	0.347
MelB	MELB	448	468	DKYRKTPPFVEQPDSPAISVV	2372.2376	4.7745	300	15	15	9.597	63.981	0.346	3	High	0.139
MelB	MELB	448	468	DKYRKTPPFVEQPDSPAISVV	2372.2376	4.7523	3000	15	15	9.31	62.066	0.417	3	High	0.168
MelB	MELB	448	469	DKYRKTPPFVEQPDSPAISVVA	2443.2747	4.517	0	16	0	0	0	n/a	1	Medium	0
MelB	MELB	448	469	DKYRKTPPFVEQPDSPAISVVA	2443.2747	4.4837	30	16	15.868	10.618	66.365	0.713	3	Medium	0.287
MelB	MELB	448	469	DKYRKTPPFVEQPDSPAISVVA	2443.2747	4.4571	300	16	16	10.733	67.08	0.097	3	Medium	0.039
MelB	MELB	448	469	DKYRKTPPFVEQPDSPAISVVA	2443.2747	4.4712	3000	16	16	10.697	66.854	0.699	3	Medium	0.282
MelB	MELB	448	471	DKYRKTPPFVEQPDSPAISVVATS	2631.3544	4.3775	0	18	0	0	0	n/a	1	High	0
MelB	MELB	448	471	DKYRKTPPFVEQPDSPAISVVATS	2631.3544	4.3545	30	18	17.868	11.684	64.909	0.418	3	High	0.168
MelB	MELB	448	471	DKYRKTPPFVEQPDSPAISVVATS	2631.3544	4.3212	300	18	18	11.8	65.555	0.248	3	High	0.1
MelB	MELB	448	471	DKYRKTPPFVEQPDSPAISVVATS	2631.3544	4.3224	3000	18	18	11.574	64.298	0.691	3	High	0.278
MelB	MELB	450	468	YRKTPPFVEQPDSPAISVV	2129.1157	5.0246	0	13	0	0	0	n/a	1	High	0
MelB	MELB	450	468	YRKTPPFVEQPDSPAISVV	2129.1157	4.9806	30	13	12.868	8.354	64.263	0.819	3	Medium	0.33
MelB	MELB	450	468	YRKTPPFVEQPDSPAISVV	2129.1157	4.9145	300	13	13	8.065	62.038	0.764	3	Medium	0.307
MelB	MELB	450	468	YRKTPPFVEQPDSPAISVV	2129.1157	4.9397	3000	13	13	7.513	57.794	1.168	3	Medium	0.47
MelB	MELB	450	469	YRKTPPFVEQPDSPAISVVA	2200.1528	4.7197	0	14	0	0	0	n/a	1	High	0
MelB	MELB	450	469	YRKTPPFVEQPDSPAISVVA	2200.1528	4.7265	30	14	13.868	9.139	65.279	0.269	3	High	0.108
MelB	MELB	450	469	YRKTPPFVEQPDSPAISVVA	2200.1528	4.6878	300	14	14	8.913	63.662	0.486	3	High	0.196
MelB	MELB	450	469	YRKTPPFVEQPDSPAISVVA	2200.1528	4.717	3000	14	14	8.561	61.152	0.309	3	High	0.125
MelB	MELB	450	471	YRKTPPFVEQPDSPAISVVATS	2388.2325	4.5564	0	16	0	0	0	n/a	1	High	0
MelB	MELB	450	471	YRKTPPFVEQPDSPAISVVATS	2388.2325	4.5014	30	16	15.868	10.327	64.541	0.652	3	High	0.263
MelB	MELB	450	471	YRKTPPFVEQPDSPAISVVATS	2388.2325	4.4784	300	16	16	10.032	62.701	0.479	3	High	0.193
MelB	MELB	450	471	YRKTPPFVEQPDSPAISVVATS	2388.2325	4.5174	3000	16	16	9.966	62.287	0.541	3	Medium	0.218
MelB	MELB	450	472	YRKTPPFVEQPDSPAISVVATSD	2503.2595	4.6248	0	17	0	0	0	n/a	1	High	0
MelB	MELB	450	472	YRKTPPFVEQPDSPAISVVATSD	2503.2595	4.6076	30	17	16.868	10.948	64.4	0.489	3	High	0.197
MelB	MELB	450	472	YRKTPPFVEQPDSPAISVVATSD	2503.2595	4.5881	300	17	17	10.858	63.872	0.475	3	High	0.191
MelB	MELB	450	472	YRKTPPFVEQPDSPAISVVATSD	2503.2595	4.6204	3000	17	17	10.357	60.924	1.142	3	Medium	0.46
MelB	MELB	450	474	YRKTPPFVEQPDSPAISVVATSDVK	2730.4228	4.3571	0	19	0	0	0	n/a	1	High	0
MelB	MELB	450	474	YRKTPPFVEQPDSPAISVVATSDVK	2730.4228	4.4048	30	19	18.774	12.361	65.058	0.667	3	Medium	0.268
MelB	MELB	450	474	YRKTPPFVEQPDSPAISVVATSDVK	2730.4228	4.4012	300	19	19	12.013	63.228	0.289	3	Medium	0.116
MelB	MELB	450	474	YRKTPPFVEQPDSPAISVVATSDVK	2730.4228	4.3246	3000	19	19	11.446	60.24	0.85	3	Medium	0.342
MelB	MELB	453	468	TPPFVEQPDSPAISVV	1681.8563	6.1515	0	11	0	0	0	n/a	1	High	0
MelB	MELB	453	468	TPPFVEQPDSPAISVV	1681.8563	6.2262	30	11	10.868	6.351	57.74	1.703	3	Medium	0.685
MelB	MELB	453	468	TPPFVEQPDSPAISVV	1681.8563	6.1825	300	11	11	6.226	56.596	1.121	3	Medium	0.451
MelB	MELB	453	468	TPPFVEQPDSPAISVV	1681.8563	6.1906	3000	11	11	5.83	52.997	0.304	3	Medium	0.122
MelB	MELB	453	469	TPPFVEQPDSPAISVVA	1752.8934	5.8984	0	12	0	0	0	n/a	1	Medium	0
MelB	MELB	453	469	TPPFVEQPDSPAISVVA	1752.8934	5.9134	30	12	11.868	7.614	63.452	0.452	3	Medium	0.182
MelB	MELB	453	469	TPPFVEQPDSPAISVVA	1752.8934	5.9013	300	12	12	7.406	61.721	0.505	3	Medium	0.203
MelB	MELB	453	469	TPPFVEQPDSPAISVVA	1752.8934	5.8779	3000	12	12	7.756	64.629	0.725	3	Medium	0.292
MelB	MELB	453	474	TPPFVEQPDSPAISVVATSDVK	2283.1634	5.3838	0	17	0	0	0	n/a	1	High	0
MelB	MELB	453	474	TPPFVEQPDSPAISVVATSDVK	2283.1634	5.3777	30	17	16.774	10.497	61.747	0.73	3	Medium	0.294
MelB	MELB	453	474	TPPFVEQPDSPAISVVATSDVK	2283.1634	5.3195	300	17	17	10.473	61.605	0.451	3	Medium	0.181
MelB	MELB	453	474	TPPFVEQPDSPAISVVATSDVK	2283.1634	5.3458	3000	17	17	10.04	59.058	0.851	3	Medium	0.343
MelB	MELB	465	474	ISVVATSDVK	1017.5706	2.3062	0	8	0	0	0	n/a	1	Medium	0
MelB	MELB	465	474	ISVVATSDVK	1017.5706	2.308	30	8	7.829	5.77	72.131	0.388	3	Medium	0.156
MelB	MELB	465	474	ISVVATSDVK	1017.5706	2.2993	300	8	8	5.551	69.389	0.35	3	Medium	0.141
MelB	MELB	465	474	ISVVATSDVK	1017.5706	2.2927	3000	8	8	5.407	67.582	0.685	3	Medium	0.276
MelB	MELB	467	474	VVATSDVK	817.4545	1.6576	0	6	0	0	0	n/a	1	Medium	0
MelB	MELB	467	474	VVATSDVK	817.4545	1.6802	30	6	5.907	3.492	58.202	0.312	3	Medium	0.125
MelB	MELB	467	474	VVATSDVK	817.4545	1.6726	300	6	6	3.386	56.431	0.427	3	Medium	0.172
MelB	MELB	467	474	VVATSDVK	817.4545	1.7006	3000	6	6	3.231	53.854	0.366	3	Medium	0.147
MelB	MELB	472	485	DVKAHHHHHHHHHH	1801.8271	1.5098	0	12	0	0	0	n/a	1	Medium	0
MelB	MELB	472	485	DVKAHHHHHHHHHH	1801.8271	1.5409	30	12	11.998	1.333	11.104	0.836	3	Medium	0.337
MelB	MELB	472	485	DVKAHHHHHHHHHH	1801.8271	1.5289	300	12	12	1.13	9.417	1.381	3	Medium	0.556
MelB	MELB	472	485	DVKAHHHHHHHHHH	1801.8271	0	3000	12	12
MelB	MELB	475	485	AHHHHHHHHHH	1459.6368	1.2365	0	9	0	0	0	n/a	1	Medium	0
MelB	MELB	475	485	AHHHHHHHHHH	1459.6368	1.326	30	9	8.998	-0.005	-0.056	0.005	3	Medium	0.002
MelB	MELB	475	485	AHHHHHHHHHH	1459.6368	1.342	300	9	9	-0.001	-0.013	0.007	3	Medium	0.003
MelB	MELB	475	485	AHHHHHHHHHH	1459.6368	0	3000	9	9
MelB_NB	MELB	1	7	SISMTTK	766.3895	1.8697	0	5	0	0	0	n/a	1	Medium	0
MelB_NB	MELB	1	7	SISMTTK	766.3895	1.8074	30	5	5	2.316	46.317	0.632	3	Medium	0.254	0.148611
MelB_NB	MELB	1	7	SISMTTK	766.3895	1.8533	300	5	5	2.066	41.327	0.259	3	Medium	0.104	0.412794
MelB_NB	MELB	1	7	SISMTTK	766.3895	1.8842	3000	5	5	2.464	49.281	0.261	3	Medium	0.105	0.021695
MelB_NB	MELB	1	8	SISMTTKL	879.4736	4.1209	0	6	0	0	0	n/a	1	High	0
MelB_NB	MELB	1	8	SISMTTKL	879.4736	4.1103	30	6	5.998	1.935	32.246	0.148	3	Medium	0.06	0.0463508
MelB_NB	MELB	1	8	SISMTTKL	879.4736	4.0769	300	6	6	2.075	34.586	0.637	3	Medium	0.256	0.971026
MelB_NB	MELB	1	8	SISMTTKL	879.4736	4.1379	3000	6	6	2.069	34.488	0.215	3	Medium	0.086	0.133481
MelB_NB	MELB	4	9	MTTKLS	679.3575	1.7428	0	4	0	0	0	n/a	1	Medium	0
MelB_NB	MELB	4	9	MTTKLS	679.3575	1.7455	30	4	3.998	0.25	6.238	0.115	3	Medium	0.046	0.0969444
MelB_NB	MELB	4	9	MTTKLS	679.3575	1.7331	300	4	4	0.297	7.435	0.46	3	Medium	0.185	0.974958
MelB_NB	MELB	4	9	MTTKLS	679.3575	1.7669	3000	4	4	0.247	6.163	0.142	3	Medium	0.057	0.026413
MelB_NB	MELB	6	14	TKLSYGFGA	942.4811	4.5511	0	7	0	0	0	n/a	1	Medium	0
MelB_NB	MELB	6	14	TKLSYGFGA	942.4811	4.5707	30	7	6.998	-0.02	-0.279	0.065	5	Medium	0.052	0.00429203
MelB_NB	MELB	6	14	TKLSYGFGA	942.4811	4.5642	300	7	7	0.085	1.214	0.227	4	Medium	0.143	0.794346
MelB_NB	MELB	6	14	TKLSYGFGA	942.4811	4.5694	3000	7	7	-0.003	-0.037	0.031	3	Medium	0.012	0.179061
MelB_NB	MELB	12	17	FGAFGK	625.3224	3.4513	0	4	0	0	0	n/a	1	Medium	0
MelB_NB	MELB	12	17	FGAFGK	625.3224	3.5149	30	4	4	0.15	3.761	0.186	5	Medium	0.149	0.865678
MelB_NB	MELB	12	17	FGAFGK	625.3224	3.4913	300	4	4	0.137	3.427	0.029	3	Medium	0.012	0.543659
MelB_NB	MELB	12	17	FGAFGK	625.3224	3.5483	3000	4	4	0.049	1.214	0.101	3	Medium	0.041	0.614541
MelB_NB	MELB	23	28	IVYMYL	800.4142	8.3333	0	4	0	0	0	n/a	1	High	0
MelB_NB	MELB	23	28	IVYMYL	800.4142	8.3587	30	4	3.994	0.363	9.081	0.322	5	Medium	0.26	0.060601
MelB_NB	MELB	23	28	IVYMYL	800.4142	8.351	300	4	4	0.187	4.67	0.18	4	Medium	0.113	0.312598
MelB_NB	MELB	23	28	IVYMYL	800.4142	8.3749	3000	4	4	0.053	1.324	0.031	4	Medium	0.02	0.00203947
MelB_NB	MELB	26	29	MYLM	556.2389	6.4935	0	2	0	0	0	n/a	1	Medium	0
MelB_NB	MELB	26	29	MYLM	556.2389	6.5324	30	2	1.995	0.195	9.77	0.295	3	Medium	0.119	0.931976
MelB_NB	MELB	26	29	MYLM	556.2389	6.5193	300	2	2	0.184	9.185	0.058	3	Medium	0.023	0.041384
MelB_NB	MELB	26	29	MYLM	556.2389	6.5633	3000	2	2	0.141	7.045	0.064	3	Medium	0.026	0.00069405
MelB_NB	MELB	29	34	MYYYTD	854.3157	4.43	0	4	0	0	0	n/a	1	Medium	0
MelB_NB	MELB	29	34	MYYYTD	854.3157	4.4519	30	4	4	0.092	2.295	0.024	3	Medium	0.01	0.00256983
MelB_NB	MELB	29	34	MYYYTD	854.3157	4.4225	300	4	4	0.059	1.481	0.008	3	Medium	0.003	0.00483772
MelB_NB	MELB	29	34	MYYYTD	854.3157	4.5101	3000	4	4	0.091	2.28	0.029	3	Medium	0.012	0.0347863
MelB_NB	MELB	35	46	VVGLSVGLVGTL	1112.6805	8.1941	0	10	0	0	0	n/a	1	Medium	0
MelB_NB	MELB	35	46	VVGLSVGLVGTL	1112.6805	8.1796	30	10	9.885	0.426	4.262	0.019	3	Medium	0.008	0.420929
MelB_NB	MELB	35	46	VVGLSVGLVGTL	1112.6805	8.1082	300	10	10	0.614	6.139	0.137	3	Medium	0.055	0.616744
MelB_NB	MELB	35	46	VVGLSVGLVGTL	1112.6805	8.0862	3000	10	10	0.553	5.534	0.083	3	Medium	0.033	0.00891751
MelB_NB	MELB	39	46	SVGLVGTL	744.4382	5.9878	0	6	0	0	0	n/a	1	High	0
MelB_NB	MELB	39	46	SVGLVGTL	744.4382	5.9998	30	6	5.886	0.311	5.177	0.017	3	High	0.007	0.474445
MelB_NB	MELB	39	46	SVGLVGTL	744.4382	6.015	300	6	6	0.221	3.682	0.018	3	High	0.007	0.068515
MelB_NB	MELB	39	46	SVGLVGTL	744.4382	6.0377	3000	6	6	0.22	3.671	0.031	3	Medium	0.012	0.0143414
MelB_NB	MELB	39	48	SVGLVGTLFL	1004.5906	10.037	0	8	0	0	0	n/a	1	High	0
MelB_NB	MELB	39	48	SVGLVGTLFL	1004.5906	10.0684	30	8	7.881	0.188	2.347	0.119	3	Medium	0.048	0.709786
MelB_NB	MELB	39	48	SVGLVGTLFL	1004.5906	10.0583	300	8	8	0.246	3.08	0.109	3	High	0.044	0.81211
MelB_NB	MELB	39	48	SVGLVGTLFL	1004.5906	10.0792	3000	8	8	0.17	2.121	0.008	3	High	0.003	0.00108099
MelB_NB	MELB	40	47	VGLVGTLF	804.4745	8.825	0	6	0	0	0	n/a	1	Medium	0
MelB_NB	MELB	40	47	VGLVGTLF	804.4745	8.807	30	6	5.885	0.505	8.413	0.023	3	Medium	0.009	0.110442
MelB_NB	MELB	40	47	VGLVGTLF	804.4745	8.8135	300	6	6	0.407	6.791	0.156	3	Medium	0.063	0.0136901
MelB_NB	MELB	40	47	VGLVGTLF	804.4745	8.816	3000	6	6	0.512	8.525	0.345	3	Medium	0.139	0.0474472
MelB_NB	MELB	42	46	LVGTL	501.3162	3.8835	0	3	0	0	0	n/a	1	Medium	0
MelB_NB	MELB	42	46	LVGTL	501.3162	3.9255	30	3	2.999	0.093	3.09	0.169	3	Medium	0.068	0.60641
MelB_NB	MELB	42	46	LVGTL	501.3162	3.9294	300	3	3	0.046	1.523	0.039	3	Medium	0.016	0.00691693
MelB_NB	MELB	42	46	LVGTL	501.3162	3.9668	3000	3	3	0.025	0.817	0.024	3	Medium	0.01	0.0017104
MelB_NB	MELB	47	51	FLVAR	604.3697	2.6012	0	3	0	0	0	n/a	1	Medium	0
MelB_NB	MELB	47	51	FLVAR	604.3697	2.6246	30	3	2.888	0.015	0.499	0.012	4	Medium	0.008	0.264982
MelB_NB	MELB	47	51	FLVAR	604.3697	2.6154	300	3	3	0.022	0.733	0.016	3	High	0.006	0.417177
MelB_NB	MELB	47	51	FLVAR	604.3697	2.6701	3000	3	3	0.012	0.387	0.001	3	Medium	0	0.187378
MelB_NB	MELB	47	53	FLVARIW	903.5331	7.5949	0	5	0	0	0	n/a	1	High	0
MelB_NB	MELB	47	53	FLVARIW	903.5331	7.559	30	5	4.867	0.036	0.71	0.016	3	High	0.007	0.00948308
MelB_NB	MELB	47	53	FLVARIW	903.5331	7.5807	300	5	5	0.024	0.474	0.004	3	High	0.002	0.631278
MelB_NB	MELB	47	53	FLVARIW	903.5331	7.5859	3000	5	5	0.015	0.305	0.015	3	Medium	0.006	0.115298
MelB_NB	MELB	48	53	LVARIW	756.4646	5.6026	0	4	0	0	0	n/a	1	Medium	0
MelB_NB	MELB	48	53	LVARIW	756.4646	5.5979	30	4	3.979	0.034	0.839	0.023	3	Medium	0.009	0.392078
MelB_NB	MELB	48	53	LVARIW	756.4646	5.6208	300	4	4	0.024	0.593	0.023	3	Medium	0.009	0.146485
MelB_NB	MELB	48	53	LVARIW	756.4646	5.6124	3000	4	4	0.011	0.269	0.041	3	Medium	0.017	0.441975
MelB_NB	MELB	49	53	VARIW	643.3806	4.609	0	3	0	0	0	n/a	1	High	0
MelB_NB	MELB	49	53	VARIW	643.3806	4.5963	30	3	2.979	0.035	1.166	0.027	3	Medium	0.011	0.116738
MelB_NB	MELB	49	53	VARIW	643.3806	4.6252	300	3	3	0.025	0.834	0.017	3	High	0.007	0.229671
MelB_NB	MELB	49	53	VARIW	643.3806	4.6463	3000	3	3	0.019	0.635	0.027	3	Medium	0.011	0.740424
MelB_NB	MELB	52	61	IWDAINDPIM	1186.5692	7.9952	0	7	0	0	0	n/a	1	High	0
MelB_NB	MELB	52	61	IWDAINDPIM	1186.5692	7.9599	30	7	6.817	-0.001	-0.011	0.015	4	Medium	0.009	0.181045
MelB_NB	MELB	52	61	IWDAINDPIM	1186.5692	7.999	300	7	7	0.023	0.327	0.023	3	Medium	0.009	0.947523
MelB_NB	MELB	52	61	IWDAINDPIM	1186.5692	7.9961	3000	7	7	0.016	0.233	0.018	3	Medium	0.007	0.419311
MelB_NB	MELB	54	66	DAINDPIMGWIVN	1456.7021	9.3861	0	10	0	0	0	n/a	1	High	0
MelB_NB	MELB	54	66	DAINDPIMGWIVN	1456.7021	9.3793	30	10	9.617	-0.03	-0.302	0.018	3	High	0.007	0.0107931
MelB_NB	MELB	54	66	DAINDPIMGWIVN	1456.7021	9.3616	300	10	10	-0.049	-0.487	0.087	3	High	0.035	0.0174533
MelB_NB	MELB	54	66	DAINDPIMGWIVN	1456.7021	9.3881	3000	10	10	0.003	0.033	0.018	3	High	0.007	0.00991808
MelB_NB	MELB	56	61	INDPIM	701.3418	4.5247	0	3	0	0	0	n/a	1	Medium	0
MelB_NB	MELB	56	61	INDPIM	701.3418	4.5318	30	3	2.853	-0.005	-0.164	0.038	3	Medium	0.015	0.0292747
MelB_NB	MELB	56	61	INDPIM	701.3418	4.5305	300	3	3	0.001	0.042	0.02	3	Medium	0.008	0.35445
MelB_NB	MELB	56	61	INDPIM	701.3418	4.5371	3000	3	3	0.016	0.549	0.012	3	Medium	0.005	0.207202
MelB_NB	MELB	62	65	GWIV	473.2638	7.1479	0	2	0	0	0	n/a	1	High	0
MelB_NB	MELB	62	65	GWIV	473.2638	7.1693	30	2	1.801	0.007	0.369	0.007	3	High	0.003	0.0834996
MelB_NB	MELB	62	65	GWIV	473.2638	7.1646	300	2	2	0.01	0.503	0.018	3	High	0.007	0.233429
MelB_NB	MELB	62	65	GWIV	473.2638	7.1959	3000	2	2	0.005	0.268	0.015	3	Medium	0.006	0.599424
MelB_NB	MELB	62	66	GWIVN	587.3067	5.539	0	3	0	0	0	n/a	1	Medium	0
MelB_NB	MELB	62	66	GWIVN	587.3067	5.4575	30	3	2.801	-0.004	-0.148	0.01	3	Medium	0.004	0.0624671
MelB_NB	MELB	62	66	GWIVN	587.3067	5.5405	300	3	3	0.01	0.33	0.025	3	Medium	0.01	0.966002
MelB_NB	MELB	62	66	GWIVN	587.3067	5.525	3000	3	3	-0.002	-0.072	0.011	3	Medium	0.005	0.017068
MelB_NB	MELB	70	76	SRWGKFK	907.5028	2.3747	0	5	0	0	0	n/a	1	Medium	0
MelB_NB	MELB	70	76	SRWGKFK	907.5028	2.1603	30	5	5	-0.017	-0.339	0.066	3	Medium	0.027	0.190324
MelB_NB	MELB	70	76	SRWGKFK	907.5028	2.1361	300	5	5	0.044	0.872	0.039	3	Medium	0.016	0.0726302
MelB_NB	MELB	70	76	SRWGKFK	907.5028	2.2036	3000	5	5	0.064	1.279	0.132	3	Medium	0.053	0.216944
MelB_NB	MELB	72	80	WGKFKPWIL	1173.6699	8.1488	0	6	0	0	0	n/a	1	Medium	0
MelB_NB	MELB	72	80	WGKFKPWIL	1173.6699	8.1484	30	6	5.845	0.059	0.981	0.091	3	Medium	0.037	0.0573799
MelB_NB	MELB	72	80	WGKFKPWIL	1173.6699	8.1571	300	6	6	0.296	4.929	0.249	3	Medium	0.1	0.555122
MelB_NB	MELB	72	80	WGKFKPWIL	1173.6699	8.1664	3000	6	6	0.356	5.934	0.288	3	Medium	0.116	0.695266
MelB_NB	MELB	81	88	IGTLTNSL	817.4545	4.9675	0	6	0	0	0	n/a	1	Medium	0
MelB_NB	MELB	81	88	IGTLTNSL	817.4545	4.9497	30	6	5.999	0.077	1.283	0.009	3	Medium	0.003	0.424675
MelB_NB	MELB	81	88	IGTLTNSL	817.4545	4.9438	300	6	6	0.1	1.671	0.037	3	Medium	0.015	0.799346
MelB_NB	MELB	81	88	IGTLTNSL	817.4545	4.9694	3000	6	6	0.058	0.974	0.052	3	Medium	0.021	0.138881
MelB_NB	MELB	85	90	TNSLVL	645.3697	5.2914	0	4	0	0	0	n/a	1	Medium	0
MelB_NB	MELB	85	90	TNSLVL	645.3697	5.2899	30	4	3.856	0.019	0.487	0.012	3	Medium	0.005	0.0364413
MelB_NB	MELB	85	90	TNSLVL	645.3697	5.2474	300	4	4	0.027	0.669	0.021	3	Medium	0.009	0.0822869
MelB_NB	MELB	85	90	TNSLVL	645.3697	5.2883	3000	4	4	0.026	0.655	0.017	3	Medium	0.007	0.0729066
MelB_NB	MELB	87	90	SLVL	430.2791	5.3072	0	2	0	0	0	n/a	1	Medium	0
MelB_NB	MELB	87	90	SLVL	430.2791	5.3303	30	2	1.856	0.001	0.044	0.01	3	Medium	0.004	0.436708
MelB_NB	MELB	87	90	SLVL	430.2791	5.3316	300	2	2	0.001	0.031	0.008	3	Medium	0.003	0.991297
MelB_NB	MELB	87	90	SLVL	430.2791	5.3508	3000	2	2	-0.003	-0.139	0.007	3	Medium	0.003	0.440804
MelB_NB	MELB	92	97	LLFSAH	686.3752	4.3775	0	4	0	0	0	n/a	1	Medium	0
MelB_NB	MELB	92	97	LLFSAH	686.3752	4.4329	30	4	3.998	0.05	1.244	0.037	3	Medium	0.015	0.103849
MelB_NB	MELB	92	97	LLFSAH	686.3752	4.399	300	4	4	0.086	2.143	0.059	3	Medium	0.024	0.71593
MelB_NB	MELB	92	97	LLFSAH	686.3752	4.4264	3000	4	4	0.222	5.549	0.209	3	Medium	0.084	0.14057
MelB_NB	MELB	92	98	LLFSAHL	799.4592	6.6468	0	5	0	0	0	n/a	1	Medium	0
MelB_NB	MELB	92	98	LLFSAHL	799.4592	6.6735	30	5	4.998	0.01	0.202	0.014	3	Medium	0.006	0.156793
MelB_NB	MELB	92	98	LLFSAHL	799.4592	6.6505	300	5	5	0.02	0.408	0.033	3	Medium	0.013	0.425287
MelB_NB	MELB	92	98	LLFSAHL	799.4592	6.6797	3000	5	5	0.027	0.541	0.068	3	Medium	0.027	0.465528
MelB_NB	MELB	94	99	FSAHLF	720.3595	6.0195	0	4	0	0	0	n/a	1	Medium	0
MelB_NB	MELB	94	99	FSAHLF	720.3595	6.008	30	4	3.998	0.011	0.273	0.004	3	Medium	0.002	0.370329
MelB_NB	MELB	94	99	FSAHLF	720.3595	6.0029	300	4	4	0.022	0.544	0.009	3	Medium	0.003	0.977643
MelB_NB	MELB	94	99	FSAHLF	720.3595	6.0277	3000	4	4	0.017	0.433	0.012	3	Medium	0.005	0.501915
MelB_NB	MELB	98	107	LFEGTAQVVF	1109.5757	7.5098	0	8	0	0	0	n/a	1	High	0
MelB_NB	MELB	98	107	LFEGTAQVVF	1109.5757	7.507	30	8	7.919	0.21	2.621	0.052	3	High	0.021	0.334293
MelB_NB	MELB	98	107	LFEGTAQVVF	1109.5757	7.5033	300	8	8	0.259	3.231	0.03	3	Medium	0.012	0.323327
MelB_NB	MELB	98	107	LFEGTAQVVF	1109.5757	7.5155	3000	8	8	0.188	2.35	0.074	3	Medium	0.03	0.0156896
MelB_NB	MELB	100	107	EGTAQVVF	849.4232	5.323	0	6	0	0	0	n/a	1	Medium	0
MelB_NB	MELB	100	107	EGTAQVVF	849.4232	5.3269	30	6	5.919	0.273	4.557	0.178	3	Medium	0.072	0.281967
MelB_NB	MELB	100	107	EGTAQVVF	849.4232	5.324	300	6	6	0.058	0.965	0.038	3	Medium	0.015	0.0415852
MelB_NB	MELB	100	107	EGTAQVVF	849.4232	5.3287	3000	6	6	0.406	6.76	0.27	3	Medium	0.109	0.0266753
MelB_NB	MELB	100	109	EGTAQVVFVC	1051.5008	6.3361	0	8	0	0	0	n/a	1	High	0
MelB_NB	MELB	100	109	EGTAQVVFVC	1051.5008	6.3624	30	8	7.903	0.091	1.132	0.106	3	Medium	0.043	0.994282
MelB_NB	MELB	100	109	EGTAQVVFVC	1051.5008	6.3617	300	8	8	0.168	2.099	0.203	3	Medium	0.082	0.660359
MelB_NB	MELB	100	109	EGTAQVVFVC	1051.5008	6.3747	3000	8	8	0.112	1.398	0.213	3	Medium	0.086	0.634286
MelB_NB	MELB	107	112	FVCVTY	730.336	5.6186	0	4	0	0	0	n/a	1	Medium	0
MelB_NB	MELB	107	112	FVCVTY	730.336	5.623	30	4	4	-0.007	-0.178	0.03	5	Medium	0.024	0.244015
MelB_NB	MELB	107	112	FVCVTY	730.336	5.6248	300	4	4	-0.011	-0.27	0.008	4	Medium	0.005	0.00147922
MelB_NB	MELB	107	112	FVCVTY	730.336	5.6398	3000	4	4	-0.001	-0.023	0.032	3	Medium	0.013	0.4337
MelB_NB	MELB	123	129	DIPFWSL	876.4382	10.2426	0	4	0	0	0	n/a	1	Medium	0
MelB_NB	MELB	123	129	DIPFWSL	876.4382	10.2753	30	4	3.997	0.009	0.234	0.01	3	Medium	0.004	0.166471
MelB_NB	MELB	123	129	DIPFWSL	876.4382	10.255	300	4	4	0.023	0.587	0.018	3	Medium	0.007	0.92486
MelB_NB	MELB	123	129	DIPFWSL	876.4382	10.2833	3000	4	4	0.016	0.399	0.009	3	Medium	0.004	0.785173
MelB_NB	MELB	124	129	IPFWSL	761.4112	9.9174	0	4	0	0	0	n/a	1	High	0
MelB_NB	MELB	124	129	IPFWSL	761.4112	9.86	30	4	3.997	-0.012	-0.289	0.016	4	Medium	0.01	0.0221698
MelB_NB	MELB	124	129	IPFWSL	761.4112	9.9004	300	4	4	0.008	0.194	0.018	3	Medium	0.007	0.404424
MelB_NB	MELB	124	129	IPFWSL	761.4112	9.896	3000	4	4	-0.002	-0.061	0.009	3	Medium	0.004	0.0697103
MelB_NB	MELB	130	135	VPTITL	642.3952	5.9509	0	4	0	0	0	n/a	1	Medium	0
MelB_NB	MELB	130	135	VPTITL	642.3952	5.9382	30	4	3.994	0.027	0.664	0.095	3	Medium	0.038	0.422967
MelB_NB	MELB	130	135	VPTITL	642.3952	5.9628	300	4	4	0.023	0.569	0.079	3	Medium	0.032	0.0960488
MelB_NB	MELB	130	135	VPTITL	642.3952	5.9428	3000	4	4	0.082	2.04	0.15	3	Medium	0.06	0.367594
MelB_NB	MELB	136	149	DKREREQLVPFPRF	1815.9744	5.7872	0	10	0	0	0	n/a	1	Medium	0
MelB_NB	MELB	136	149	DKREREQLVPFPRF	1815.9744	5.741	30	10	9.885	0.18	1.797	0.08	5	Medium	0.064	0.0727738
MelB_NB	MELB	136	149	DKREREQLVPFPRF	1815.9744	5.6578	300	10	10	0.542	5.417	0.694	3	Medium	0.279	0.128165
MelB_NB	MELB	136	149	DKREREQLVPFPRF	1815.9744	5.7258	3000	10	10	0.477	4.766	0.193	3	Medium	0.078	0.0112688
MelB_NB	MELB	138	149	REREQLVPFPRF	1572.8525	5.9705	0	8	0	0	0	n/a	1	Medium	0
MelB_NB	MELB	138	149	REREQLVPFPRF	1572.8525	5.9339	30	8	7.885	0.13	1.625	0.013	3	High	0.005	0.127507
MelB_NB	MELB	138	149	REREQLVPFPRF	1572.8525	6.0169	300	8	8	0.23	2.876	0.304	3	Medium	0.122	0.0582481
MelB_NB	MELB	138	149	REREQLVPFPRF	1572.8525	5.968	3000	8	8	0.292	3.651	0.119	3	Medium	0.048	0.0191015
MelB_NB	MELB	138	150	REREQLVPFPRFF	1719.9209	7.4673	0	9	0	0	0	n/a	1	Medium	0
MelB_NB	MELB	138	150	REREQLVPFPRFF	1719.9209	7.4324	30	9	8.885	0.243	2.697	0.33	3	Medium	0.133	0.0742648
MelB_NB	MELB	138	150	REREQLVPFPRFF	1719.9209	7.4435	300	9	9	0.456	5.067	0.579	3	Medium	0.233	0.437029
MelB_NB	MELB	138	150	REREQLVPFPRFF	1719.9209	7.4759	3000	9	9	0.338	3.756	0.322	3	Medium	0.13	0.00433698
MelB_NB	MELB	139	149	EREQLVPFPRF	1416.7514	6.743	0	7	0	0	0	n/a	1	Medium	0
MelB_NB	MELB	139	149	EREQLVPFPRF	1416.7514	6.7494	30	7	6.885	0.152	2.174	0.019	3	High	0.008	0.162901
MelB_NB	MELB	139	149	EREQLVPFPRF	1416.7514	6.7182	300	7	7	0.274	3.911	0.304	3	High	0.122	0.0408618
MelB_NB	MELB	139	149	EREQLVPFPRF	1416.7514	6.7669	3000	7	7	0.363	5.192	0.109	3	Medium	0.044	0.00577446
MelB_NB	MELB	139	150	EREQLVPFPRFF	1563.8198	8.2241	0	8	0	0	0	n/a	1	Medium	0
MelB_NB	MELB	139	150	EREQLVPFPRFF	1563.8198	8.2018	30	8	7.885	0.14	1.749	0.059	3	High	0.024	0.149401
MelB_NB	MELB	139	150	EREQLVPFPRFF	1563.8198	8.2166	300	8	8	0.272	3.397	0.304	3	High	0.123	0.0373762
MelB_NB	MELB	139	150	EREQLVPFPRFF	1563.8198	8.2073	3000	8	8	0.425	5.312	0.145	3	Medium	0.059	0.00485375
MelB_NB	MELB	139	152	EREQLVPFPRFFAS	1721.8889	7.7536	0	10	0	0	0	n/a	1	Medium	0
MelB_NB	MELB	139	152	EREQLVPFPRFFAS	1721.8889	7.7312	30	10	9.885	0.151	1.507	0.046	3	Medium	0.019	0.167437
MelB_NB	MELB	139	152	EREQLVPFPRFFAS	1721.8889	7.725	300	10	10	0.31	3.096	0.272	4	Medium	0.171	0.043317
MelB_NB	MELB	139	152	EREQLVPFPRFFAS	1721.8889	7.708	3000	10	10	0.344	3.444	0.204	3	Medium	0.082	0.0112222
MelB_NB	MELB	139	153	EREQLVPFPRFFASL	1834.973	9.3149	0	11	0	0	0	n/a	1	High	0
MelB_NB	MELB	139	153	EREQLVPFPRFFASL	1834.973	9.2681	30	11	10.885	0.076	0.692	0.177	3	Medium	0.071	0.0524551
MelB_NB	MELB	139	153	EREQLVPFPRFFASL	1834.973	9.302	300	11	11	0.216	1.962	0.326	3	High	0.131	0.0230321
MelB_NB	MELB	139	153	EREQLVPFPRFFASL	1834.973	9.2851	3000	11	11	0.131	1.187	0.24	3	Medium	0.097	0.000415804
MelB_NB	MELB	140	149	REQLVPFPRF	1287.7088	6.6674	0	6	0	0	0	n/a	1	Medium	0
MelB_NB	MELB	140	149	REQLVPFPRF	1287.7088	6.6858	30	6	5.885	0.101	1.686	0.035	3	Medium	0.014	0.248349
MelB_NB	MELB	140	149	REQLVPFPRF	1287.7088	6.6797	300	6	6	0.178	2.966	0.214	3	Medium	0.086	0.0373782
MelB_NB	MELB	140	149	REQLVPFPRF	1287.7088	6.711	3000	6	6	0.258	4.294	0.122	3	Medium	0.049	0.0143654
MelB_NB	MELB	141	149	EQLVPFPRF	1131.6077	7.616	0	5	0	0	0	n/a	1	Medium	0
MelB_NB	MELB	141	149	EQLVPFPRF	1131.6077	7.5927	30	5	4.885	0.116	2.323	0.014	3	High	0.006	0.412536
MelB_NB	MELB	141	149	EQLVPFPRF	1131.6077	7.6317	300	5	5	0.172	3.449	0.145	3	High	0.058	0.0444782
MelB_NB	MELB	141	149	EQLVPFPRF	1131.6077	7.6522	3000	5	5	0.271	5.412	0.063	3	Medium	0.026	0.01521
MelB_NB	MELB	141	150	EQLVPFPRFF	1278.6761	9.1979	0	6	0	0	0	n/a	1	High	0
MelB_NB	MELB	141	150	EQLVPFPRFF	1278.6761	9.1966	30	6	5.885	0.007	0.11	0.045	3	High	0.018	0.0428157
MelB_NB	MELB	141	150	EQLVPFPRFF	1278.6761	9.197	300	6	6	0.045	0.752	0.057	3	High	0.023	0.00108923
MelB_NB	MELB	141	150	EQLVPFPRFF	1278.6761	9.2025	3000	6	6	0.136	2.262	0.206	3	Medium	0.083	0.00556544
MelB_NB	MELB	141	152	EQLVPFPRFFAS	1436.7452	8.5095	0	8	0	0	0	n/a	1	High	0
MelB_NB	MELB	141	152	EQLVPFPRFFAS	1436.7452	8.4666	30	8	7.885	0.073	0.907	0.044	5	Medium	0.035	0.100603
MelB_NB	MELB	141	152	EQLVPFPRFFAS	1436.7452	8.4828	300	8	8	0.197	2.465	0.143	4	Medium	0.09	0.0155379
MelB_NB	MELB	141	152	EQLVPFPRFFAS	1436.7452	8.5129	3000	8	8	0.206	2.571	0.193	3	Medium	0.078	0.000316133
MelB_NB	MELB	141	153	EQLVPFPRFFASL	1549.8293	10.0867	0	9	0	0	0	n/a	1	High	0
MelB_NB	MELB	141	153	EQLVPFPRFFASL	1549.8293	10.0775	30	9	8.885	0.063	0.702	0.025	3	Medium	0.01	0.104311
MelB_NB	MELB	141	153	EQLVPFPRFFASL	1549.8293	10.1088	300	9	9	0.134	1.492	0.116	3	Medium	0.047	0.00762066
MelB_NB	MELB	141	153	EQLVPFPRFFASL	1549.8293	10.0748	3000	9	9	0.199	2.214	0.081	3	Medium	0.033	0.00504043
MelB_NB	MELB	142	149	QLVPFPRF	1002.5651	7.5206	0	4	0	0	0	n/a	1	High	0
MelB_NB	MELB	142	149	QLVPFPRF	1002.5651	7.4788	30	4	3.885	0.049	1.223	0.002	3	High	0.001	0.0512651
MelB_NB	MELB	142	149	QLVPFPRF	1002.5651	7.4814	300	4	4	0.142	3.561	0.123	3	High	0.049	0.150325
MelB_NB	MELB	142	149	QLVPFPRF	1002.5651	7.4862	3000	4	4	0.149	3.726	0.095	3	High	0.038	0.0286638
MelB_NB	MELB	143	149	LVPFPRF	874.5065	7.185	0	3	0	0	0	n/a	1	Medium	0
MelB_NB	MELB	143	149	LVPFPRF	874.5065	7.2516	30	3	2.997	0.039	1.294	0.036	3	Medium	0.014	0.0635905
MelB_NB	MELB	143	149	LVPFPRF	874.5065	7.1853	300	3	3	0.128	4.27	0.14	3	Medium	0.056	0.176315
MelB_NB	MELB	143	149	LVPFPRF	874.5065	7.4017	3000	3	3	0.144	4.793	0.066	3	Medium	0.026	0.028647
MelB_NB	MELB	143	150	LVPFPRFF	1021.5749	9.0323	0	4	0	0	0	n/a	1	High	0
MelB_NB	MELB	143	150	LVPFPRFF	1021.5749	8.9878	30	4	3.997	0.004	0.102	0.042	4	Medium	0.026	0.0292237
MelB_NB	MELB	143	150	LVPFPRFF	1021.5749	8.9744	300	4	4	0.06	1.489	0.076	3	Medium	0.03	0.0134713
MelB_NB	MELB	143	150	LVPFPRFF	1021.5749	8.9586	3000	4	4	0.113	2.836	0.022	3	Medium	0.009	0.0365548
MelB_NB	MELB	150	153	FASL	436.2322	4.4826	0	2	0	0	0	n/a	1	High	0
MelB_NB	MELB	150	153	FASL	436.2322	4.4324	30	2	2	0.007	0.356	0.006	3	High	0.002	0.202932
MelB_NB	MELB	150	153	FASL	436.2322	4.4696	300	2	2	0.026	1.287	0.028	3	Medium	0.011	0.0651812
MelB_NB	MELB	150	153	FASL	436.2322	4.5121	3000	2	2	0.034	1.705	0.018	3	High	0.007	0.00714963
MelB_NB	MELB	154	158	AGFVT	493.2536	3.2729	0	3	0	0	0	n/a	1	High	0
MelB_NB	MELB	154	158	AGFVT	493.2536	3.3218	30	3	2.983	0.055	1.849	0.041	3	High	0.016	0.0429594
MelB_NB	MELB	154	158	AGFVT	493.2536	3.3339	300	3	3	0.065	2.167	0.036	3	High	0.015	0.00196158
MelB_NB	MELB	154	158	AGFVT	493.2536	3.3703	3000	3	3	0.081	2.693	0.076	3	High	0.031	0.000989235
MelB_NB	MELB	154	163	AGFVTAGITL	948.528	7.3982	0	8	0	0	0	n/a	1	Medium	0
MelB_NB	MELB	154	163	AGFVTAGITL	948.528	7.4	30	8	7.976	0.154	1.927	0.098	3	Medium	0.04	0.283719
MelB_NB	MELB	154	163	AGFVTAGITL	948.528	7.4368	300	8	8	0.121	1.507	0.015	3	Medium	0.006	0.0777071
MelB_NB	MELB	154	163	AGFVTAGITL	948.528	7.4928	3000	8	8	0.07	0.876	0.026	3	Medium	0.01	0.00608281
MelB_NB	MELB	154	168	AGFVTAGITLPFVSY	1541.813	9.773	0	12	0	0	0	n/a	1	High	0
MelB_NB	MELB	154	168	AGFVTAGITLPFVSY	1541.813	9.7546	30	12	11.956	0.169	1.41	0.053	5	High	0.043	0.224818
MelB_NB	MELB	154	168	AGFVTAGITLPFVSY	1541.813	9.7561	300	12	12	0.227	1.894	0.194	4	High	0.122	0.0756239
MelB_NB	MELB	154	168	AGFVTAGITLPFVSY	1541.813	9.7977	3000	12	12	0.242	2.015	0.123	4	High	0.077	0.00280155
MelB_NB	MELB	156	163	FVTAGITL	820.4695	6.7145	0	6	0	0	0	n/a	1	Medium	0
MelB_NB	MELB	156	163	FVTAGITL	820.4695	6.7565	30	6	5.992	0.034	0.564	0.15	3	Medium	0.06	0.379452
MelB_NB	MELB	156	163	FVTAGITL	820.4695	6.7578	300	6	6	0.054	0.906	0.019	4	Medium	0.012	0.115021
MelB_NB	MELB	156	163	FVTAGITL	820.4695	6.7545	3000	6	6	0.049	0.814	0.085	3	Medium	0.034	0.00910945
MelB_NB	MELB	156	168	FVTAGITLPFVSY	1413.7544	9.4696	0	10	0	0	0	n/a	1	High	0
MelB_NB	MELB	156	168	FVTAGITLPFVSY	1413.7544	9.4997	30	10	9.973	0.089	0.89	0.01	3	High	0.004	0.178452
MelB_NB	MELB	156	168	FVTAGITLPFVSY	1413.7544	9.5109	300	10	10	0.165	1.65	0.236	3	High	0.095	0.177775
MelB_NB	MELB	156	168	FVTAGITLPFVSY	1413.7544	9.5352	3000	10	10	0.153	1.528	0.146	3	High	0.059	0.0079949
MelB_NB	MELB	157	168	VTAGITLPFVSY	1266.686	8.6714	0	9	0	0	0	n/a	1	Medium	0
MelB_NB	MELB	157	168	VTAGITLPFVSY	1266.686	8.6161	30	9	8.973	0.102	1.133	0.01	3	Medium	0.004	0.0824484
MelB_NB	MELB	157	168	VTAGITLPFVSY	1266.686	8.6608	300	9	9	0.169	1.875	0.156	3	Medium	0.063	0.306325
MelB_NB	MELB	157	168	VTAGITLPFVSY	1266.686	8.6657	3000	9	9	0.143	1.586	0.09	3	Medium	0.036	0.0299799
MelB_NB	MELB	159	168	AGITLPFVSY	1066.5699	8.6754	0	7	0	0	0	n/a	1	High	0
MelB_NB	MELB	159	168	AGITLPFVSY	1066.5699	8.6654	30	7	6.973	0.082	1.166	0.023	3	Medium	0.009	0.393851
MelB_NB	MELB	159	168	AGITLPFVSY	1066.5699	8.6324	300	7	7	0.131	1.877	0.152	3	High	0.061	0.888813
MelB_NB	MELB	159	168	AGITLPFVSY	1066.5699	8.6894	3000	7	7	0.134	1.918	0.09	3	High	0.036	0.00806729
MelB_NB	MELB	161	168	ITLPFVSY	938.5113	8.3922	0	5	0	0	0	n/a	1	High	0
MelB_NB	MELB	161	168	ITLPFVSY	938.5113	8.3882	30	5	4.98	0.061	1.226	0.051	3	High	0.021	0.0672513
MelB_NB	MELB	161	168	ITLPFVSY	938.5113	8.4035	300	5	5	0.123	2.455	0.108	3	High	0.044	0.5732
MelB_NB	MELB	161	168	ITLPFVSY	938.5113	8.4017	3000	5	5	0.118	2.351	0.076	3	High	0.031	0.0131322
MelB_NB	MELB	169	180	VGGADRGFGFQM	1240.5659	6.4362	0	10	0	0	0	n/a	1	Medium	0
MelB_NB	MELB	169	180	VGGADRGFGFQM	1240.5659	6.4606	30	10	10	0.094	0.936	0.085	3	Medium	0.034	0.280981
MelB_NB	MELB	169	180	VGGADRGFGFQM	1240.5659	6.4658	300	10	10	0.16	1.597	0.217	3	Medium	0.087	0.40474
MelB_NB	MELB	169	180	VGGADRGFGFQM	1240.5659	6.4711	3000	10	10	0.149	1.492	0.131	3	Medium	0.053	0.276288
MelB_NB	MELB	171	180	GADRGFGFQM	1084.476	6.3254	0	8	0	0	0	n/a	1	Medium	0
MelB_NB	MELB	171	180	GADRGFGFQM	1084.476	6.3911	30	8	8	0.085	1.057	0.021	3	Medium	0.008	0.00203191
MelB_NB	MELB	171	180	GADRGFGFQM	1084.476	6.4092	300	8	8	0.081	1.014	0.062	3	Medium	0.025	0.128949
MelB_NB	MELB	171	180	GADRGFGFQM	1084.476	6.4103	3000	8	8	0.068	0.851	0.051	3	Medium	0.021	0.375574
MelB_NB	MELB	174	180	RGFGFQM	841.3905	6.3359	0	5	0	0	0	n/a	1	High	0
MelB_NB	MELB	174	180	RGFGFQM	841.3905	6.3781	30	5	5	0.03	0.596	0.025	3	High	0.01	0.504232
MelB_NB	MELB	174	180	RGFGFQM	841.3905	6.3844	300	5	5	0.046	0.926	0.029	3	High	0.012	0.15754
MelB_NB	MELB	174	180	RGFGFQM	841.3905	6.4137	3000	5	5	0.029	0.571	0.004	3	Medium	0.002	0.0352216
MelB_NB	MELB	192	199	STIVTLRN	902.5185	2.5802	0	6	0	0	0	n/a	1	Medium	0
MelB_NB	MELB	192	199	STIVTLRN	902.5185	2.6117	30	6	5.871	0.01	0.173	0.019	3	Medium	0.008	0.28401
MelB_NB	MELB	192	199	STIVTLRN	902.5185	2.589	300	6	6	0.034	0.561	0.036	3	Medium	0.015	0.476471
MelB_NB	MELB	192	199	STIVTLRN	902.5185	2.6433	3000	6	6	0.025	0.419	0.014	3	Medium	0.006	0.113242
MelB_NB	MELB	192	203	STIVTLRNVHEV	1366.7569	3.8015	0	10	0	0	0	n/a	1	Medium	0
MelB_NB	MELB	192	203	STIVTLRNVHEV	1366.7569	3.8487	30	10	9.792	0.039	0.39	0.071	3	High	0.029	0.165747
MelB_NB	MELB	192	203	STIVTLRNVHEV	1366.7569	3.8393	300	10	10	0.087	0.874	0.102	3	High	0.041	0.298776
MelB_NB	MELB	192	203	STIVTLRNVHEV	1366.7569	3.8576	3000	10	10	0.051	0.505	0.079	3	Medium	0.032	0.0587666
MelB_NB	MELB	194	198	IVTLR	600.3959	2.2323	0	3	0	0	0	n/a	1	Medium	0
MelB_NB	MELB	194	198	IVTLR	600.3959	2.2324	30	3	2.999	0.035	1.175	0.02	3	Medium	0.008	1.0065
MelB_NB	MELB	194	198	IVTLR	600.3959	2.214	300	3	3	0.035	1.16	0.012	3	Medium	0.005	0.300262
MelB_NB	MELB	194	198	IVTLR	600.3959	2.2602	3000	3	3	0.041	1.368	0.013	3	Medium	0.005	0.910737
MelB_NB	MELB	194	199	IVTLRN	714.4388	1.9907	0	4	0	0	0	n/a	1	Medium	0
MelB_NB	MELB	194	199	IVTLRN	714.4388	1.9881	30	4	3.999	0.024	0.607	0.078	3	Medium	0.031	0.783916
MelB_NB	MELB	194	199	IVTLRN	714.4388	2.0018	300	4	4	0.035	0.88	0.037	3	Medium	0.015	0.659273
MelB_NB	MELB	194	199	IVTLRN	714.4388	2.0282	3000	4	4	0.034	0.855	0.063	3	Medium	0.026	0.163629
MelB_NB	MELB	194	200	IVTLRNV	813.5072	3.857	0	5	0	0	0	n/a	1	Medium	0
MelB_NB	MELB	194	200	IVTLRNV	813.5072	3.8666	30	5	4.999	0.077	1.545	0.04	3	Medium	0.016	0.342232
MelB_NB	MELB	194	200	IVTLRNV	813.5072	3.8601	300	5	5	0.069	1.37	0.057	3	Medium	0.023	0.135763
MelB_NB	MELB	194	200	IVTLRNV	813.5072	3.8936	3000	5	5	0.103	2.062	0.042	3	Medium	0.017	0.173359
MelB_NB	MELB	194	201	IVTLRNVH	950.5661	2.106	0	6	0	0	0	n/a	1	Medium	0
MelB_NB	MELB	194	201	IVTLRNVH	950.5661	2.1383	30	6	5.999	0.038	0.631	0.016	3	Medium	0.006	0.281661
MelB_NB	MELB	194	201	IVTLRNVH	950.5661	2.1238	300	6	6	0.05	0.832	0.028	3	Medium	0.011	0.297236
MelB_NB	MELB	194	201	IVTLRNVH	950.5661	2.1734	3000	6	6	0.019	0.315	0.022	3	Medium	0.009	0.368248
MelB_NB	MELB	194	203	IVTLRNVHEV	1178.6772	3.3284	0	8	0	0	0	n/a	1	Medium	0
MelB_NB	MELB	194	203	IVTLRNVHEV	1178.6772	3.3569	30	8	7.921	0.067	0.836	0.078	3	Medium	0.031	0.262343
MelB_NB	MELB	194	203	IVTLRNVHEV	1178.6772	3.3543	300	8	8	0.106	1.323	0.254	3	Medium	0.102	0.875612
MelB_NB	MELB	194	203	IVTLRNVHEV	1178.6772	3.354	3000	8	8	0.032	0.402	0.055	3	Medium	0.022	0.0175791
MelB_NB	MELB	194	204	IVTLRNVHEVY	1341.7405	4.0025	0	9	0	0	0	n/a	1	Medium	0
MelB_NB	MELB	194	204	IVTLRNVHEVY	1341.7405	4.012	30	9	8.92	0.082	0.909	0.077	3	Medium	0.031	0.21893
MelB_NB	MELB	194	204	IVTLRNVHEVY	1341.7405	4.018	300	9	9	0.161	1.784	0.128	3	Medium	0.051	0.191386
MelB_NB	MELB	194	204	IVTLRNVHEVY	1341.7405	4.059	3000	9	9	0.116	1.286	0.101	3	Medium	0.041	0.0996271
MelB_NB	MELB	212	225	AGRPHLTLKTIVGL	1474.8984	5.6062	0	11	0	0	0	n/a	1	Medium	0
MelB_NB	MELB	212	225	AGRPHLTLKTIVGL	1474.8984	5.6275	30	11	10.87	1.212	11.014	0.127	3	Medium	0.051	0.819118
MelB_NB	MELB	212	225	AGRPHLTLKTIVGL	1474.8984	5.5763	300	11	11	1.37	12.452	0.772	3	Medium	0.311	0.964188
MelB_NB	MELB	212	225	AGRPHLTLKTIVGL	1474.8984	5.6483	3000	11	11	1.258	11.435	0.884	3	Medium	0.356	0.109962
MelB_NB	MELB	219	225	LKTIVGL	742.4953	4.9253	0	5	0	0	0	n/a	1	High	0
MelB_NB	MELB	219	225	LKTIVGL	742.4953	4.9211	30	5	4.87	0.28	5.605	0.094	3	Medium	0.038	0.000535754
MelB_NB	MELB	219	225	LKTIVGL	742.4953	4.944	300	5	5	0.263	5.261	0.129	3	Medium	0.052	0.000967069
MelB_NB	MELB	219	225	LKTIVGL	742.4953	4.9504	3000	5	5	0.424	8.483	0.162	3	Medium	0.065	1.58E-05
MelB_NB	MELB	219	227	LKTIVGLIY	1018.6427	7.3186	0	7	0	0	0	n/a	1	High	0
MelB_NB	MELB	219	227	LKTIVGLIY	1018.6427	7.3131	30	7	6.738	0.274	3.916	0.161	3	Medium	0.065	0.0545498
MelB_NB	MELB	219	227	LKTIVGLIY	1018.6427	7.3067	300	7	7	0.264	3.767	0.126	3	Medium	0.051	0.0233808
MelB_NB	MELB	219	227	LKTIVGLIY	1018.6427	7.33	3000	7	7	0.337	4.821	0.208	3	Medium	0.084	3.96E-05
MelB_NB	MELB	220	225	KTIVGL	629.4112	3.6879	0	4	0	0	0	n/a	1	Medium	0
MelB_NB	MELB	220	225	KTIVGL	629.4112	3.7643	30	4	3.87	0.04	1.011	0.074	3	Medium	0.03	0.0799879
MelB_NB	MELB	220	225	KTIVGL	629.4112	3.7162	300	4	4	0.055	1.364	0.008	4	Medium	0.005	0.00821297
MelB_NB	MELB	220	225	KTIVGL	629.4112	3.7981	3000	4	4	0.082	2.049	0.045	3	Medium	0.018	0.00059658
MelB_NB	MELB	220	227	KTIVGLIY	905.5586	6.1836	0	6	0	0	0	n/a	1	Medium	0
MelB_NB	MELB	220	227	KTIVGLIY	905.5586	6.1751	30	6	5.738	0.059	0.979	0.136	3	Medium	0.055	0.104482
MelB_NB	MELB	220	227	KTIVGLIY	905.5586	6.159	300	6	6	0.072	1.199	0.047	3	Medium	0.019	0.0111749
MelB_NB	MELB	220	227	KTIVGLIY	905.5586	6.2007	3000	6	6	0.083	1.392	0.07	3	Medium	0.028	0.000872631
MelB_NB	MELB	221	225	TIVGL	501.3162	5.0196	0	3	0	0	0	n/a	1	High	0
MelB_NB	MELB	221	225	TIVGL	501.3162	5.0082	30	3	2.875	0.119	3.951	0.113	3	High	0.045	0.844742
MelB_NB	MELB	221	225	TIVGL	501.3162	5.0048	300	3	3	0.085	2.818	0.156	3	High	0.063	0.00604753
MelB_NB	MELB	221	225	TIVGL	501.3162	5.0414	3000	3	3	0.077	2.579	0.016	3	High	0.007	0.00219061
MelB_NB	MELB	222	227	IVGLIY	676.416	6.8245	0	4	0	0	0	n/a	1	Medium	0
MelB_NB	MELB	222	227	IVGLIY	676.416	6.8875	30	4	3.867	0.041	1.029	0.021	3	Medium	0.009	0.0209566
MelB_NB	MELB	222	227	IVGLIY	676.416	6.8587	300	4	4	0.04	0.994	0.027	3	Medium	0.011	0.0123829
MelB_NB	MELB	222	227	IVGLIY	676.416	6.8936	3000	4	4	0.058	1.444	0.036	3	Medium	0.014	0.00706097
MelB_NB	MELB	226	232	IYKNDQL	892.4654	2.5643	0	5	0	0	0	n/a	1	High	0
MelB_NB	MELB	226	232	IYKNDQL	892.4654	2.5736	30	5	4.999	0.097	1.937	0.134	3	High	0.054	0.0174711
MelB_NB	MELB	226	232	IYKNDQL	892.4654	2.5327	300	5	5	0.293	5.853	0.343	3	Medium	0.138	0.132078
MelB_NB	MELB	226	232	IYKNDQL	892.4654	2.6101	3000	5	5	0.551	11.017	0.262	3	Medium	0.105	0.0432124
MelB_NB	MELB	226	235	IYKNDQLSCL	1195.5907	5.1707	0	8	0	0	0	n/a	1	Medium	0
MelB_NB	MELB	226	235	IYKNDQLSCL	1195.5907	5.1677	30	8	7.999	0.525	6.56	0.14	3	Medium	0.057	0.129209
MelB_NB	MELB	226	235	IYKNDQLSCL	1195.5907	5.1481	300	8	8	0.402	5.021	0.472	3	Medium	0.19	0.634034
MelB_NB	MELB	226	235	IYKNDQLSCL	1195.5907	5.1568	3000	8	8	0.388	4.845	0.197	3	Medium	0.079	0.207454
MelB_NB	MELB	243	253	NIASNIINGFA	1132.5877	8.4663	0	9	0	0	0	n/a	1	High	0
MelB_NB	MELB	243	253	NIASNIINGFA	1132.5877	8.452	30	9	8.858	0.112	1.242	0.063	3	Medium	0.025	0.00749241
MelB_NB	MELB	243	253	NIASNIINGFA	1132.5877	8.4573	300	9	9	0.053	0.59	0.074	3	Medium	0.03	0.979825
MelB_NB	MELB	243	253	NIASNIINGFA	1132.5877	8.4445	3000	9	9	0.068	0.76	0.179	3	Medium	0.072	0.261077
MelB_NB	MELB	244	253	IASNIINGFA	1018.5447	6.3727	0	8	0	0	0	n/a	1	Medium	0
MelB_NB	MELB	244	253	IASNIINGFA	1018.5447	6.399	30	8	7.858	0.024	0.295	0.108	3	Medium	0.044	0.554857
MelB_NB	MELB	244	253	IASNIINGFA	1018.5447	6.3927	300	8	8	0.035	0.442	0.11	3	Medium	0.044	0.642681
MelB_NB	MELB	244	253	IASNIINGFA	1018.5447	6.3858	3000	8	8	0.008	0.096	0.032	3	Medium	0.013	0.0266123
MelB_NB	MELB	244	255	IASNIINGFAIY	1294.6921	8.3225	0	10	0	0	0	n/a	1	High	0
MelB_NB	MELB	244	255	IASNIINGFAIY	1294.6921	8.4037	30	10	9.819	0.153	1.531	0.467	3	High	0.188	0.93105
MelB_NB	MELB	244	255	IASNIINGFAIY	1294.6921	8.3755	300	10	10	0.12	1.204	0.171	3	Medium	0.069	0.00613942
MelB_NB	MELB	244	255	IASNIINGFAIY	1294.6921	8.3833	3000	10	10	0.068	0.684	0.072	3	Medium	0.029	3.82E-06
MelB_NB	MELB	246	255	SNIINGFAIY	1110.571	7.8929	0	8	0	0	0	n/a	1	High	0
MelB_NB	MELB	246	255	SNIINGFAIY	1110.571	7.9082	30	8	7.819	0.185	2.314	0.529	3	Medium	0.213	0.663416
MelB_NB	MELB	246	255	SNIINGFAIY	1110.571	7.888	300	8	8	0.169	2.113	0.168	3	Medium	0.068	0.00938956
MelB_NB	MELB	246	255	SNIINGFAIY	1110.571	7.8797	3000	8	8	0.063	0.784	0.037	3	Medium	0.015	0.00111335
MelB_NB	MELB	256	259	YFTY	592.2533	5.4807	0	2	0	0	0	n/a	1	Medium	0
MelB_NB	MELB	256	259	YFTY	592.2533	5.4887	30	2	2	0.049	2.443	0.191	3	Medium	0.077	0.538741
MelB_NB	MELB	256	259	YFTY	592.2533	5.473	300	2	2	0.042	2.088	0.072	3	Medium	0.029	0.0705082
MelB_NB	MELB	256	259	YFTY	592.2533	5.5022	3000	2	2	0.007	0.35	0.037	3	Medium	0.015	0.000973169
MelB_NB	MELB	256	262	YFTYVIG	861.4273	6.9935	0	5	0	0	0	n/a	1	Medium	0
MelB_NB	MELB	256	262	YFTYVIG	861.4273	6.9864	30	5	4.891	0.205	4.102	0.344	3	Medium	0.138	0.899721
MelB_NB	MELB	256	262	YFTYVIG	861.4273	6.972	300	5	5	0.239	4.786	0.12	3	Medium	0.048	0.116139
MelB_NB	MELB	256	262	YFTYVIG	861.4273	6.9855	3000	5	5	0.189	3.776	0.031	3	Medium	0.012	0.000127122
MelB_NB	MELB	260	267	VIGDADLF	848.428	7.2117	0	6	0	0	0	n/a	1	Medium	0
MelB_NB	MELB	260	267	VIGDADLF	848.428	7.1686	30	6	5.956	0.206	3.433	0.114	3	Medium	0.046	0.190107
MelB_NB	MELB	260	267	VIGDADLF	848.428	7.1806	300	6	6	0.227	3.782	0.153	3	Medium	0.061	0.077392
MelB_NB	MELB	260	267	VIGDADLF	848.428	7.2115	3000	6	6	0.236	3.939	0.139	4	Medium	0.088	0.0559727
MelB_NB	MELB	260	270	VIGDADLFPYY	1271.6074	8.8584	0	8	0	0	0	n/a	1	High	0
MelB_NB	MELB	260	270	VIGDADLFPYY	1271.6074	8.8135	30	8	7.952	0.17	2.128	0.086	3	Medium	0.035	0.169713
MelB_NB	MELB	260	270	VIGDADLFPYY	1271.6074	8.8082	300	8	8	0.309	3.859	0.214	3	Medium	0.086	0.0848249
MelB_NB	MELB	260	270	VIGDADLFPYY	1271.6074	8.8201	3000	8	8	0.252	3.154	0.168	3	Medium	0.067	0.031623
MelB_NB	MELB	263	270	DADLFPYY	1002.4335	8.2844	0	5	0	0	0	n/a	1	High	0
MelB_NB	MELB	263	270	DADLFPYY	1002.4335	8.2939	30	5	4.952	0.05	1.003	0.062	3	Medium	0.025	0.166232
MelB_NB	MELB	263	270	DADLFPYY	1002.4335	8.2957	300	5	5	0.095	1.891	0.061	3	High	0.025	0.0710495
MelB_NB	MELB	263	270	DADLFPYY	1002.4335	8.3294	3000	5	5	0.061	1.222	0.044	3	High	0.018	0.0234071
MelB_NB	MELB	263	271	DADLFPYYL	1115.5175	9.7964	0	6	0	0	0	n/a	1	Medium	0
MelB_NB	MELB	263	271	DADLFPYYL	1115.5175	9.8385	30	6	5.947	0.068	1.142	0.101	3	Medium	0.041	0.144034
MelB_NB	MELB	263	271	DADLFPYYL	1115.5175	9.8448	300	6	6	0.1	1.674	0.06	3	Medium	0.024	0.0742026
MelB_NB	MELB	263	271	DADLFPYYL	1115.5175	9.782	3000	6	6	0.08	1.333	0.07	3	Medium	0.028	0.015308
MelB_NB	MELB	263	273	DADLFPYYLSY	1365.6129	9.6446	0	8	0	0	0	n/a	1	High	0
MelB_NB	MELB	263	273	DADLFPYYLSY	1365.6129	9.6303	30	8	7.947	0.098	1.231	0.228	3	Medium	0.092	0.179309
MelB_NB	MELB	263	273	DADLFPYYLSY	1365.6129	9.6377	300	8	8	0.179	2.234	0.163	3	Medium	0.066	0.0670993
MelB_NB	MELB	263	273	DADLFPYYLSY	1365.6129	9.6464	3000	8	8	0.222	2.775	0.169	3	High	0.068	0.0176987
MelB_NB	MELB	273	282	YAGAANLLTL	1005.5495	7.7379	0	8	0	0	0	n/a	1	High	0
MelB_NB	MELB	273	282	YAGAANLLTL	1005.5495	7.7669	30	8	7.946	0.237	2.957	0.085	3	High	0.034	0.0136492
MelB_NB	MELB	273	282	YAGAANLLTL	1005.5495	7.7506	300	8	8	0.252	3.156	0.168	3	High	0.067	0.0025587
MelB_NB	MELB	273	282	YAGAANLLTL	1005.5495	7.7494	3000	8	8	0.273	3.415	0.084	3	High	0.034	0.00430483
MelB_NB	MELB	274	282	AGAANLLTL	842.4862	7.1053	0	7	0	0	0	n/a	1	High	0
MelB_NB	MELB	274	282	AGAANLLTL	842.4862	7.1527	30	7	6.946	0.083	1.185	0.109	3	High	0.044	0.0756965
MelB_NB	MELB	274	282	AGAANLLTL	842.4862	7.1388	300	7	7	0.098	1.406	0.058	3	High	0.024	0.000770547
MelB_NB	MELB	274	282	AGAANLLTL	842.4862	7.1715	3000	7	7	0.082	1.171	0.075	3	High	0.03	0.00733194
MelB_NB	MELB	281	288	TLIVFPRL	957.6011	7.9472	0	5	0	0	0	n/a	1	High	0
MelB_NB	MELB	281	288	TLIVFPRL	957.6011	7.9682	30	5	4.747	0.093	1.864	0.041	3	High	0.016	0.00315127
MelB_NB	MELB	281	288	TLIVFPRL	957.6011	7.9587	300	5	5	0.102	2.038	0.03	4	High	0.019	0.00202431
MelB_NB	MELB	281	288	TLIVFPRL	957.6011	7.9814	3000	5	5	0.155	3.099	0.176	3	High	0.071	0.00354213
MelB_NB	MELB	282	288	LIVFPRL	856.5535	7.7166	0	4	0	0	0	n/a	1	Medium	0
MelB_NB	MELB	282	288	LIVFPRL	856.5535	7.7071	30	4	3.875	0.073	1.836	0.102	3	Medium	0.041	0.0394318
MelB_NB	MELB	282	288	LIVFPRL	856.5535	7.7005	300	4	4	0.083	2.071	0.169	3	Medium	0.068	0.00455561
MelB_NB	MELB	282	288	LIVFPRL	856.5535	7.715	3000	4	4	0.284	7.104	0.168	3	Medium	0.068	0.0112812
MelB_NB	MELB	283	288	IVFPRL	743.4694	6.7485	0	3	0	0	0	n/a	1	Medium	0
MelB_NB	MELB	283	288	IVFPRL	743.4694	6.737	30	3	2.999	0.117	3.906	0.035	3	High	0.014	0.010307
MelB_NB	MELB	283	288	IVFPRL	743.4694	6.7367	300	3	3	0.095	3.154	0.06	3	High	0.024	0.00174674
MelB_NB	MELB	283	288	IVFPRL	743.4694	6.7535	3000	3	3	0.171	5.716	0.143	3	High	0.058	0.0054917
MelB_NB	MELB	283	290	IVFPRLVK	970.6328	4.2203	0	5	0	0	0	n/a	1	Medium	0
MelB_NB	MELB	283	290	IVFPRLVK	970.6328	4.2227	30	5	4.887	0.288	5.764	0.057	3	Medium	0.023	0.0909257
MelB_NB	MELB	283	290	IVFPRLVK	970.6328	4.2483	300	5	5	0.267	5.346	0.098	3	Medium	0.04	6.25E-05
MelB_NB	MELB	283	290	IVFPRLVK	970.6328	4.2448	3000	5	5	0.451	9.019	0.367	3	Medium	0.148	0.00426106
MelB_NB	MELB	291	297	MLSRRIL	887.5375	3.0616	0	5	0	0	0	n/a	1	Medium	0
MelB_NB	MELB	291	297	MLSRRIL	887.5375	3.0805	30	5	4.935	0.668	13.363	0.304	3	Medium	0.122	0.35875
MelB_NB	MELB	291	297	MLSRRIL	887.5375	3.0501	300	5	5	0.712	14.249	0.634	3	Medium	0.255	0.150037
MelB_NB	MELB	291	297	MLSRRIL	887.5375	3.1219	3000	5	5	0.886	17.712	0.466	3	Medium	0.188	0.119265
MelB_NB	MELB	292	297	LSRRIL	756.497	2.2905	0	4	0	0	0	n/a	1	Medium	0
MelB_NB	MELB	292	297	LSRRIL	756.497	2.2893	30	4	3.935	0.613	15.328	0.203	3	Medium	0.082	0.349711
MelB_NB	MELB	292	297	LSRRIL	756.497	2.3102	300	4	4	0.478	11.941	0.463	3	Medium	0.187	0.0817257
MelB_NB	MELB	292	297	LSRRIL	756.497	2.3451	3000	4	4	0.699	17.469	0.321	3	Medium	0.129	0.102321
MelB_NB	MELB	295	301	RILWAGA	785.4548	5.3332	0	5	0	0	0	n/a	1	Medium	0
MelB_NB	MELB	295	301	RILWAGA	785.4548	5.3756	30	5	4.925	0.098	1.962	0.05	3	Medium	0.02	0.223377
MelB_NB	MELB	295	301	RILWAGA	785.4548	5.3764	300	5	5	0.143	2.868	0.097	3	Medium	0.039	0.72879
MelB_NB	MELB	295	301	RILWAGA	785.4548	5.3972	3000	5	5	0.089	1.772	0.043	3	Medium	0.017	0.0309142
MelB_NB	MELB	295	304	RILWAGASVM	1102.5957	6.6887	0	8	0	0	0	n/a	1	Medium	0
MelB_NB	MELB	295	304	RILWAGASVM	1102.5957	6.6629	30	8	7.924	0.078	0.975	0.257	3	Medium	0.104	0.340724
MelB_NB	MELB	295	304	RILWAGASVM	1102.5957	6.686	300	8	8	0.286	3.574	0.181	3	Medium	0.073	0.0815835
MelB_NB	MELB	295	304	RILWAGASVM	1102.5957	6.6838	3000	8	8	0.165	2.056	0.11	3	Medium	0.044	0.0649723
MelB_NB	MELB	298	301	WAGA	403.1856	2.7176	0	2	0	0	0	n/a	1	Medium	0
MelB_NB	MELB	298	301	WAGA	403.1856	2.7542	30	2	2	0.02	0.985	0.016	3	Medium	0.007	0.894073
MelB_NB	MELB	298	301	WAGA	403.1856	2.7219	300	2	2	0.05	2.486	0.073	3	Medium	0.029	0.326902
MelB_NB	MELB	298	301	WAGA	403.1856	2.7033	3000	2	2	0.054	2.708	0.046	3	Medium	0.019	0.921675
MelB_NB	MELB	298	304	WAGASVM	720.3265	5.1137	0	5	0	0	0	n/a	1	High	0
MelB_NB	MELB	298	304	WAGASVM	720.3265	5.1185	30	5	4.999	0.082	1.643	0.046	3	High	0.019	0.716953
MelB_NB	MELB	298	304	WAGASVM	720.3265	5.1187	300	5	5	0.165	3.296	0.222	3	High	0.089	0.278985
MelB_NB	MELB	298	304	WAGASVM	720.3265	5.1481	3000	5	5	0.101	2.027	0.07	3	High	0.028	0.880965
MelB_NB	MELB	298	307	WAGASVMPVL	1029.5317	7.8931	0	7	0	0	0	n/a	1	Medium	0
MelB_NB	MELB	298	307	WAGASVMPVL	1029.5317	7.9063	30	7	6.837	0.074	1.063	0.114	3	Medium	0.046	0.174075
MelB_NB	MELB	298	307	WAGASVMPVL	1029.5317	7.8917	300	7	7	0.274	3.911	0.095	3	Medium	0.038	0.021591
MelB_NB	MELB	298	307	WAGASVMPVL	1029.5317	7.9284	3000	7	7	0.058	0.824	0.061	3	Medium	0.025	0.527164
MelB_NB	MELB	302	307	SVMPVL	644.3567	5.9274	0	3	0	0	0	n/a	1	Medium	0
MelB_NB	MELB	302	307	SVMPVL	644.3567	6.0322	30	3	2.838	0.022	0.737	0.023	3	Medium	0.009	0.793786
MelB_NB	MELB	302	307	SVMPVL	644.3567	5.9811	300	3	3	0.052	1.72	0.083	3	Medium	0.034	0.321235
MelB_NB	MELB	302	307	SVMPVL	644.3567	6.0254	3000	3	3	0.026	0.876	0.022	3	Medium	0.009	0.930313
MelB_NB	MELB	308	312	SCAGL	449.1944	2.9081	0	3	0	0	0	n/a	1	Medium	0
MelB_NB	MELB	308	312	SCAGL	449.1944	2.8954	30	3	2.999	-0.002	-0.067	0.004	3	Medium	0.001	0.0138184
MelB_NB	MELB	308	312	SCAGL	449.1944	2.9381	300	3	3	0.012	0.392	0.021	3	Medium	0.009	0.649334
MelB_NB	MELB	308	312	SCAGL	449.1944	2.9656	3000	3	3	0.002	0.074	0.01	3	Medium	0.004	0.258021
MelB_NB	MELB	313	316	FAMA	438.1937	3.6825	0	2	0	0	0	n/a	1	High	0
MelB_NB	MELB	313	316	FAMA	438.1937	3.7015	30	2	2	0.016	0.783	0.038	3	High	0.015	0.556756
MelB_NB	MELB	313	316	FAMA	438.1937	3.6965	300	2	2	0.009	0.459	0.034	3	Medium	0.014	0.238409
MelB_NB	MELB	313	316	FAMA	438.1937	3.7173	3000	2	2	0.008	0.38	0.002	3	High	0.001	3.02E-05
MelB_NB	MELB	316	321	ALADIH	638.3388	2.1591	0	4	0	0	0	n/a	1	Medium	0
MelB_NB	MELB	316	321	ALADIH	638.3388	2.1597	30	4	3.892	0.33	8.242	0.248	3	Medium	0.1	0.468848
MelB_NB	MELB	316	321	ALADIH	638.3388	2.1386	300	4	4	0.23	5.746	0.123	3	Medium	0.05	0.0187078
MelB_NB	MELB	316	321	ALADIH	638.3388	2.2089	3000	4	4	0.232	5.788	0.301	3	Medium	0.121	0.0022429
MelB_NB	MELB	316	325	ALADIHNAAL	1007.54	4.1419	0	8	0	0	0	n/a	1	Medium	0
MelB_NB	MELB	316	325	ALADIHNAAL	1007.54	4.1447	30	8	7.883	0.587	7.334	0.168	5	Medium	0.136	0.899982
MelB_NB	MELB	316	325	ALADIHNAAL	1007.54	4.1346	300	8	8	0.616	7.7	0.386	4	Medium	0.243	0.0441233
MelB_NB	MELB	316	325	ALADIHNAAL	1007.54	4.1503	3000	8	8	0.466	5.831	0.252	3	Medium	0.101	0.00269373
MelB_NB	MELB	317	323	LADIHNA	752.3817	1.8801	0	5	0	0	0	n/a	1	High	0
MelB_NB	MELB	317	323	LADIHNA	752.3817	1.8914	30	5	4.892	0.236	4.714	0.246	3	Medium	0.099	0.0793316
MelB_NB	MELB	317	323	LADIHNA	752.3817	1.8915	300	5	5	0.314	6.285	0.31	3	Medium	0.125	0.0234955
MelB_NB	MELB	317	323	LADIHNA	752.3817	1.925	3000	5	5	0.407	8.136	0.216	3	Medium	0.087	0.0462415
MelB_NB	MELB	317	325	LADIHNAAL	936.5029	3.577	0	7	0	0	0	n/a	1	High	0
MelB_NB	MELB	317	325	LADIHNAAL	936.5029	3.5992	30	7	6.883	0.407	5.811	0.09	3	Medium	0.036	0.411516
MelB_NB	MELB	317	325	LADIHNAAL	936.5029	3.5912	300	7	7	0.401	5.724	0.367	3	Medium	0.148	0.0160708
MelB_NB	MELB	317	325	LADIHNAAL	936.5029	3.6256	3000	7	7	0.36	5.136	0.211	3	Medium	0.085	0.00791744
MelB_NB	MELB	322	328	NAALIVA	670.4014	4.0157	0	5	0	0	0	n/a	1	Medium	0
MelB_NB	MELB	322	328	NAALIVA	670.4014	4.025	30	5	4.739	0.032	0.644	0.069	3	Medium	0.028	0.640603
MelB_NB	MELB	322	328	NAALIVA	670.4014	4.0233	300	5	5	0.012	0.247	0.069	3	Medium	0.028	0.057707
MelB_NB	MELB	322	328	NAALIVA	670.4014	4.0342	3000	5	5	0.061	1.23	0.11	3	Medium	0.044	0.0195156
MelB_NB	MELB	325	332	LIVAAGIF	802.4953	8.06	0	6	0	0	0	n/a	1	Medium	0
MelB_NB	MELB	325	332	LIVAAGIF	802.4953	8.0691	30	6	5.867	0.011	0.182	0.052	3	Medium	0.021	0.714935
MelB_NB	MELB	325	332	LIVAAGIF	802.4953	8.064	300	6	6	0.009	0.149	0.028	3	Medium	0.011	0.101455
MelB_NB	MELB	325	332	LIVAAGIF	802.4953	8.0728	3000	6	6	0.059	0.978	0.115	3	Medium	0.046	0.501082
MelB_NB	MELB	326	334	IVAAGIFLN	916.5382	6.9354	0	7	0	0	0	n/a	1	Medium	0
MelB_NB	MELB	326	334	IVAAGIFLN	916.5382	6.9651	30	7	6.986	0.073	1.047	0.145	3	Medium	0.059	0.214675
MelB_NB	MELB	326	334	IVAAGIFLN	916.5382	6.9733	300	7	7	0.011	0.156	0.079	3	Medium	0.032	0.523604
MelB_NB	MELB	326	334	IVAAGIFLN	916.5382	6.9239	3000	7	7	0.031	0.436	0.09	3	Medium	0.036	0.948112
MelB_NB	MELB	329	334	AGIFLN	633.3486	5.8825	0	4	0	0	0	n/a	1	High	0
MelB_NB	MELB	329	334	AGIFLN	633.3486	5.8836	30	4	3.986	0.022	0.553	0.008	3	High	0.003	0.151723
MelB_NB	MELB	329	334	AGIFLN	633.3486	5.8911	300	4	4	0.029	0.729	0.011	3	High	0.005	0.0875194
MelB_NB	MELB	329	334	AGIFLN	633.3486	5.8961	3000	4	4	0.022	0.561	0.003	3	High	0.001	0.647206
MelB_NB	MELB	333	339	LNIGTAL	700.4119	5.5974	0	5	0	0	0	n/a	1	Medium	0
MelB_NB	MELB	333	339	LNIGTAL	700.4119	5.6206	30	5	4.99	0.003	0.055	0.011	3	Medium	0.005	0.691334
MelB_NB	MELB	333	339	LNIGTAL	700.4119	5.5888	300	5	5	0.014	0.284	0.014	3	Medium	0.006	0.502212
MelB_NB	MELB	333	339	LNIGTAL	700.4119	5.5884	3000	5	5	0.006	0.124	0.01	3	Medium	0.004	0.0879473
MelB_NB	MELB	348	358	VADTVDYGEFK	1242.5768	4.2203	0	9	0	0	0	n/a	1	High	0
MelB_NB	MELB	348	358	VADTVDYGEFK	1242.5768	4.2671	30	9	8.994	0.103	1.14	0.089	3	Medium	0.036	0.600224
MelB_NB	MELB	348	358	VADTVDYGEFK	1242.5768	4.2465	300	9	9	0.23	2.552	0.205	3	High	0.083	0.789573
MelB_NB	MELB	348	358	VADTVDYGEFK	1242.5768	4.2625	3000	9	9	0.262	2.908	0.248	3	High	0.1	0.353187
MelB_NB	MELB	350	358	DTVDYGEFK	1072.4713	3.984	0	7	0	0	0	n/a	1	Medium	0
MelB_NB	MELB	350	358	DTVDYGEFK	1072.4713	3.9675	30	7	6.994	0.091	1.297	0.072	3	Medium	0.029	0.474767
MelB_NB	MELB	350	358	DTVDYGEFK	1072.4713	3.9591	300	7	7	0.174	2.485	0.175	3	Medium	0.07	0.563462
MelB_NB	MELB	350	358	DTVDYGEFK	1072.4713	3.9854	3000	7	7	0.174	2.49	0.196	3	Medium	0.079	0.196615
MelB_NB	MELB	363	367	CESIA	521.2155	2.0535	0	3	0	0	0	n/a	1	High	0
MelB_NB	MELB	363	367	CESIA	521.2155	2.0743	30	3	2.999	0.623	20.768	0.169	3	Medium	0.068	0.168582
MelB_NB	MELB	363	367	CESIA	521.2155	2.0634	300	3	3	0.597	19.901	0.571	3	Medium	0.23	0.0489872
MelB_NB	MELB	363	367	CESIA	521.2155	2.0997	3000	3	3	0.85	28.324	0.216	3	Medium	0.087	0.0637454
MelB_NB	MELB	372	383	TMVVKGGSAFAA	1137.5852	3.4671	0	10	0	0	0	n/a	1	Medium	0
MelB_NB	MELB	372	383	TMVVKGGSAFAA	1137.5852	3.5171	30	10	9.913	0.089	0.885	0.086	3	Medium	0.035	0.454287
MelB_NB	MELB	372	383	TMVVKGGSAFAA	1137.5852	3.4811	300	10	10	0.112	1.121	0.073	3	Medium	0.029	0.180883
MelB_NB	MELB	372	383	TMVVKGGSAFAA	1137.5852	3.5486	3000	10	10	0.062	0.616	0.033	3	Medium	0.013	0.000769142
MelB_NB	MELB	374	383	VVKGGSAFAA	905.4971	2.4117	0	8	0	0	0	n/a	1	Medium	0
MelB_NB	MELB	374	383	VVKGGSAFAA	905.4971	2.4601	30	8	8	0.068	0.856	0.076	3	Medium	0.03	0.745044
MelB_NB	MELB	374	383	VVKGGSAFAA	905.4971	2.4529	300	8	8	0.072	0.896	0.055	3	Medium	0.022	0.0316485
MelB_NB	MELB	374	383	VVKGGSAFAA	905.4971	2.5011	3000	8	8	0.093	1.168	0.078	3	Medium	0.031	0.0666181
MelB_NB	MELB	381	385	FAAFF	601.29	8.7933	0	3	0	0	0	n/a	1	Medium	0
MelB_NB	MELB	381	385	FAAFF	601.29	8.7816	30	3	3	0.037	1.234	0.059	3	Medium	0.024	0.903962
MelB_NB	MELB	381	385	FAAFF	601.29	8.7372	300	3	3	0.043	1.442	0.037	3	Medium	0.015	0.0274563
MelB_NB	MELB	381	385	FAAFF	601.29	8.7854	3000	3	3	0.043	1.422	0.038	3	Medium	0.015	0.00519959
MelB_NB	MELB	382	387	AAFFIA	638.3428	7.3079	0	4	0	0	0	n/a	1	Medium	0
MelB_NB	MELB	382	387	AAFFIA	638.3428	7.3192	30	4	3.979	0.013	0.32	0.022	3	Medium	0.009	0.268595
MelB_NB	MELB	382	387	AAFFIA	638.3428	7.2981	300	4	4	0.034	0.851	0.056	3	Medium	0.023	0.988991
MelB_NB	MELB	382	387	AAFFIA	638.3428	7.2869	3000	4	4	0.025	0.625	0.05	4	Medium	0.031	0.939044
MelB_NB	MELB	388	392	LVLGL	513.3526	7.1106	0	3	0	0	0	n/a	1	Medium	0
MelB_NB	MELB	388	392	LVLGL	513.3526	7.1472	30	3	2.967	0.113	3.766	0.277	3	Medium	0.111	0.340084
MelB_NB	MELB	388	392	LVLGL	513.3526	7.1116	300	3	3	0.094	3.12	0.089	3	Medium	0.036	0.138464
MelB_NB	MELB	388	392	LVLGL	513.3526	7.0986	3000	3	3	0.036	1.21	0.032	3	Medium	0.013	0.0290028
MelB_NB	MELB	388	400	LVLGLIGYTPNVA	1328.7704	8.3017	0	10	0	0	0	n/a	1	Medium	0
MelB_NB	MELB	388	400	LVLGLIGYTPNVA	1328.7704	8.3013	30	10	9.838	0.438	4.38	0.157	3	Medium	0.063	0.0697963
MelB_NB	MELB	388	400	LVLGLIGYTPNVA	1328.7704	8.3059	300	10	10	0.488	4.878	0.245	3	Medium	0.099	0.938265
MelB_NB	MELB	388	400	LVLGLIGYTPNVA	1328.7704	8.2959	3000	10	10	0.412	4.119	0.079	3	Medium	0.032	0.0266471
MelB_NB	MELB	391	406	GLIGYTPNVAQSAQTL	1631.8519	6.1677	0	13	0	0	0	n/a	1	Medium	0
MelB_NB	MELB	391	406	GLIGYTPNVAQSAQTL	1631.8519	6.1816	30	13	12.87	0.212	1.631	0.487	3	Medium	0.196	0.514149
MelB_NB	MELB	391	406	GLIGYTPNVAQSAQTL	1631.8519	6.1614	300	13	13	0.472	3.633	0.429	3	Medium	0.173	0.510371
MelB_NB	MELB	391	406	GLIGYTPNVAQSAQTL	1631.8519	6.1623	3000	13	13	0.434	3.341	0.197	3	Medium	0.079	0.174027
MelB_NB	MELB	393	404	IGYTPNVAQSAQ	1247.6146	3.0087	0	9	0	0	0	n/a	1	High	0
MelB_NB	MELB	393	404	IGYTPNVAQSAQ	1247.6146	2.992	30	9	8.999	0.048	0.532	0.215	3	High	0.086	0.328231
MelB_NB	MELB	393	404	IGYTPNVAQSAQ	1247.6146	3.005	300	9	9	0.207	2.298	0.28	3	High	0.113	0.60595
MelB_NB	MELB	393	404	IGYTPNVAQSAQ	1247.6146	3.0324	3000	9	9	0.122	1.357	0.085	3	High	0.034	0.600193
MelB_NB	MELB	405	413	TLQGMQFIM	1067.5144	8.3546	0	7	0	0	0	n/a	1	Medium	0
MelB_NB	MELB	405	413	TLQGMQFIM	1067.5144	8.3382	30	7	6.979	0.062	0.881	0.166	3	Medium	0.067	0.684833
MelB_NB	MELB	405	413	TLQGMQFIM	1067.5144	8.323	300	7	7	0.121	1.725	0.112	3	Medium	0.045	0.833227
MelB_NB	MELB	405	413	TLQGMQFIM	1067.5144	8.3144	3000	7	7	0.012	0.175	0.039	3	Medium	0.016	0.119666
MelB_NB	MELB	407	413	QGMQFIM	853.3826	7.5869	0	5	0	0	0	n/a	1	Medium	0
MelB_NB	MELB	407	413	QGMQFIM	853.3826	7.5894	30	5	4.979	0.069	1.374	0.091	5	Medium	0.073	0.12524
MelB_NB	MELB	407	413	QGMQFIM	853.3826	7.5822	300	5	5	0.056	1.113	0.038	4	Medium	0.024	0.301536
MelB_NB	MELB	407	413	QGMQFIM	853.3826	7.6001	3000	5	5	0.02	0.399	0.019	4	Medium	0.012	0.0378885
MelB_NB	MELB	412	416	IMIVL	587.3717	7.7963	0	3	0	0	0	n/a	1	Medium	0
MelB_NB	MELB	412	416	IMIVL	587.3717	7.8208	30	3	2.83	0.008	0.275	0.021	3	Medium	0.008	0.216086
MelB_NB	MELB	412	416	IMIVL	587.3717	7.8201	300	3	3	0.011	0.352	0.011	3	Medium	0.004	0.208607
MelB_NB	MELB	412	416	IMIVL	587.3717	7.8301	3000	3	3	0.009	0.301	0.003	3	Medium	0.001	0.867261
MelB_NB	MELB	423	427	MTLVL	575.3353	7.1585	0	3	0	0	0	n/a	1	Medium	0
MelB_NB	MELB	423	427	MTLVL	575.3353	7.1509	30	3	2.855	0.023	0.77	0.017	3	Medium	0.007	0.678746
MelB_NB	MELB	423	427	MTLVL	575.3353	7.1164	300	3	3	0.023	0.772	0.046	3	Medium	0.018	0.36135
MelB_NB	MELB	423	427	MTLVL	575.3353	7.1575	3000	3	3	0.017	0.563	0.018	3	Medium	0.007	0.905799
MelB_NB	MELB	426	430	VLYFR	696.3959	4.5932	0	3	0	0	0	n/a	1	High	0
MelB_NB	MELB	426	430	VLYFR	696.3959	4.5958	30	3	2.997	0.053	1.767	0.047	3	Medium	0.019	0.177301
MelB_NB	MELB	426	430	VLYFR	696.3959	4.6026	300	3	3	0.044	1.475	0.032	3	High	0.013	0.974781
MelB_NB	MELB	426	430	VLYFR	696.3959	4.5961	3000	3	3	0.046	1.519	0.022	3	Medium	0.009	0.517431
MelB_NB	MELB	426	431	VLYFRY	859.4592	6.2202	0	4	0	0	0	n/a	1	High	0
MelB_NB	MELB	426	431	VLYFRY	859.4592	6.231	30	4	3.997	0.029	0.718	0.069	3	High	0.028	0.318571
MelB_NB	MELB	426	431	VLYFRY	859.4592	6.2585	300	4	4	0.041	1.018	0.055	3	High	0.022	0.635366
MelB_NB	MELB	426	431	VLYFRY	859.4592	6.275	3000	4	4	0.012	0.308	0.015	3	High	0.006	0.0564536
MelB_NB	MELB	428	431	YFRY	647.3067	3.9999	0	2	0	0	0	n/a	1	High	0
MelB_NB	MELB	428	431	YFRY	647.3067	3.9803	30	2	2	0.013	0.655	0.074	3	Medium	0.03	0.872108
MelB_NB	MELB	428	431	YFRY	647.3067	3.9984	300	2	2	0.021	1.035	0.019	3	Medium	0.008	0.132903
MelB_NB	MELB	428	431	YFRY	647.3067	4.029	3000	2	2	0.004	0.204	0.017	3	Medium	0.007	0.130331
MelB_NB	MELB	431	434	YYRL	613.3224	3.9416	0	2	0	0	0	n/a	1	High	0
MelB_NB	MELB	431	434	YYRL	613.3224	3.9801	30	2	2	0.002	0.114	0.005	3	Medium	0.002	0.494006
MelB_NB	MELB	431	434	YYRL	613.3224	3.9801	300	2	2	0.018	0.882	0.034	3	Medium	0.014	0.586697
MelB_NB	MELB	431	434	YYRL	613.3224	3.9906	3000	2	2	0.008	0.39	0.024	3	Medium	0.01	0.28444
MelB_NB	MELB	438	443	MLRKIQ	787.4738	1.6841	0	4	0	0	0	n/a	1	Medium	0
MelB_NB	MELB	438	443	MLRKIQ	787.4738	1.6676	30	4	3.988	0.278	6.944	0.075	3	Medium	0.03	0.150988
MelB_NB	MELB	438	443	MLRKIQ	787.4738	1.6695	300	4	4	0.427	10.676	0.434	3	Medium	0.175	0.00699589
MelB_NB	MELB	438	443	MLRKIQ	787.4738	1.7225	3000	4	4	1.326	33.159	0.278	3	Medium	0.112	0.0353889
MelB_NB	MELB	440	447	RKIQIHLL	1019.6604	4.1158	0	6	0	0	0	n/a	1	Medium	0
MelB_NB	MELB	440	447	RKIQIHLL	1019.6604	4.1148	30	6	5.929	0.326	5.431	0.253	3	Medium	0.102	0.62494
MelB_NB	MELB	440	447	RKIQIHLL	1019.6604	4.105	300	6	6	0.658	10.964	0.48	3	Medium	0.193	0.344684
MelB_NB	MELB	440	447	RKIQIHLL	1019.6604	4.0969	3000	6	6	2.084	34.737	0.505	3	Medium	0.203	0.0357075
MelB_NB	MELB	448	466	DKYRKTPPFVEQPDSPAIS	2174.1008	3.3375	0	13	0	0	0	n/a	1	Medium	0
MelB_NB	MELB	448	466	DKYRKTPPFVEQPDSPAIS	2174.1008	3.2681	30	13	12.945	6.806	52.357	0.346	3	Medium	0.139	0.0235004
MelB_NB	MELB	448	466	DKYRKTPPFVEQPDSPAIS	2174.1008	3.2232	300	13	13	6.802	52.325	0.919	3	Medium	0.37	0.0185149
MelB_NB	MELB	448	466	DKYRKTPPFVEQPDSPAIS	2174.1008	3.2788	3000	13	13	7.987	61.439	0.035	3	Medium	0.014	0.186648
MelB_NB	MELB	448	467	DKYRKTPPFVEQPDSPAISV	2273.1692	4.4323	0	14	0	0	0	n/a	1	Medium	0
MelB_NB	MELB	448	467	DKYRKTPPFVEQPDSPAISV	2273.1692	4.4538	30	14	13.944	7.702	55.016	0.293	3	Medium	0.118	0.015663
MelB_NB	MELB	448	467	DKYRKTPPFVEQPDSPAISV	2273.1692	4.4152	300	14	14	7.794	55.674	0.614	3	Medium	0.247	0.01044
MelB_NB	MELB	448	467	DKYRKTPPFVEQPDSPAISV	2273.1692	4.3696	3000	14	14	8.844	63.173	0.167	3	Medium	0.067	0.303321
MelB_NB	MELB	448	468	DKYRKTPPFVEQPDSPAISVV	2372.2376	4.7862	0	15	0	0	0	n/a	1	High	0
MelB_NB	MELB	448	468	DKYRKTPPFVEQPDSPAISVV	2372.2376	4.7538	30	15	14.868	8.469	56.462	0.599	3	High	0.241	0.0149925
MelB_NB	MELB	448	468	DKYRKTPPFVEQPDSPAISVV	2372.2376	4.6157	300	15	15	8.15	54.332	0.257	3	Medium	0.103	0.000221347
MelB_NB	MELB	448	468	DKYRKTPPFVEQPDSPAISVV	2372.2376	4.7565	3000	15	15	9.636	64.243	0.07	3	Medium	0.028	0.0740805
MelB_NB	MELB	448	469	DKYRKTPPFVEQPDSPAISVVA	2443.2747	4.517	0	16	0	0	0	n/a	1	Medium	0
MelB_NB	MELB	448	469	DKYRKTPPFVEQPDSPAISVVA	2443.2747	4.4663	30	16	15.868	9.919	61.996	0.492	3	Medium	0.198	0.030905
MelB_NB	MELB	448	469	DKYRKTPPFVEQPDSPAISVVA	2443.2747	4.4651	300	16	16	9.509	59.429	0.739	3	Medium	0.298	0.017763
MelB_NB	MELB	448	469	DKYRKTPPFVEQPDSPAISVVA	2443.2747	4.537	3000	16	16	11.041	69.008	0.391	3	Medium	0.158	0.157228
MelB_NB	MELB	448	471	DKYRKTPPFVEQPDSPAISVVATS	2631.3544	4.3775	0	18	0	0	0	n/a	1	High	0
MelB_NB	MELB	448	471	DKYRKTPPFVEQPDSPAISVVATS	2631.3544	4.2861	30	18	17.868	11.113	61.741	0.259	3	Medium	0.104	0.0119968
MelB_NB	MELB	448	471	DKYRKTPPFVEQPDSPAISVVATS	2631.3544	4.321	300	18	18	10.561	58.671	0.713	3	Medium	0.287	0.0106523
MelB_NB	MELB	448	471	DKYRKTPPFVEQPDSPAISVVATS	2631.3544	4.371	3000	18	18	11.452	63.62	0.29	3	Medium	0.117	0.53949
MelB_NB	MELB	450	468	YRKTPPFVEQPDSPAISVV	2129.1157	5.0246	0	13	0	0	0	n/a	1	High	0
MelB_NB	MELB	450	468	YRKTPPFVEQPDSPAISVV	2129.1157	4.8466	30	13	12.868	7.466	57.43	0.5	3	Medium	0.201	0.0235817
MelB_NB	MELB	450	468	YRKTPPFVEQPDSPAISVV	2129.1157	4.896	300	13	13	6.857	52.747	2.158	3	Medium	0.869	0.125723
MelB_NB	MELB	450	468	YRKTPPFVEQPDSPAISVV	2129.1157	4.9185	3000	13	13	8.092	62.248	0.863	3	Medium	0.347	0.167625
MelB_NB	MELB	450	469	YRKTPPFVEQPDSPAISVVA	2200.1528	4.7197	0	14	0	0	0	n/a	1	High	0
MelB_NB	MELB	450	469	YRKTPPFVEQPDSPAISVVA	2200.1528	4.711	30	14	13.868	8.21	58.64	0.478	3	High	0.192	0.00449596
MelB_NB	MELB	450	469	YRKTPPFVEQPDSPAISVVA	2200.1528	4.6773	300	14	14	7.845	56.035	2.013	3	Medium	0.81	0.14342
MelB_NB	MELB	450	469	YRKTPPFVEQPDSPAISVVA	2200.1528	4.7388	3000	14	14	8.882	63.446	0.416	3	Medium	0.168	0.0611063
MelB_NB	MELB	450	471	YRKTPPFVEQPDSPAISVVATS	2388.2325	4.5564	0	16	0	0	0	n/a	1	High	0
MelB_NB	MELB	450	471	YRKTPPFVEQPDSPAISVVATS	2388.2325	4.5087	30	16	15.868	9.822	61.387	0.171	3	High	0.069	0.0711974
MelB_NB	MELB	450	471	YRKTPPFVEQPDSPAISVVATS	2388.2325	4.4918	300	16	16	9.3	58.122	1.594	3	Medium	0.642	0.17912
MelB_NB	MELB	450	471	YRKTPPFVEQPDSPAISVVATS	2388.2325	4.528	3000	16	16	10.107	63.167	1.114	3	Medium	0.448	0.659554
MelB_NB	MELB	450	472	YRKTPPFVEQPDSPAISVVATSD	2503.2595	4.6248	0	17	0	0	0	n/a	1	High	0
MelB_NB	MELB	450	472	YRKTPPFVEQPDSPAISVVATSD	2503.2595	4.603	30	17	16.868	10.324	60.728	0.381	3	Medium	0.153	0.0140022
MelB_NB	MELB	450	472	YRKTPPFVEQPDSPAISVVATSD	2503.2595	4.5997	300	17	17	9.553	56.196	1.516	3	Medium	0.61	0.0549433
MelB_NB	MELB	450	472	YRKTPPFVEQPDSPAISVVATSD	2503.2595	4.614	3000	17	17	10.424	61.32	0.994	3	Medium	0.4	0.857783
MelB_NB	MELB	450	474	YRKTPPFVEQPDSPAISVVATSDVK	2730.4228	4.3571	0	19	0	0	0	n/a	1	High	0
MelB_NB	MELB	450	474	YRKTPPFVEQPDSPAISVVATSDVK	2730.4228	4.4004	30	19	18.774	11.569	60.89	0.96	3	High	0.387	0.0500263
MelB_NB	MELB	450	474	YRKTPPFVEQPDSPAISVVATSDVK	2730.4228	4.3157	300	19	19	11.331	59.634	1.322	3	Medium	0.532	0.150962
MelB_NB	MELB	450	474	YRKTPPFVEQPDSPAISVVATSDVK	2730.4228	4.3462	3000	19	19	11.688	61.516	0.48	3	Medium	0.193	0.359991
MelB_NB	MELB	453	468	TPPFVEQPDSPAISVV	1681.8563	6.1515	0	11	0	0	0	n/a	1	High	0
MelB_NB	MELB	453	468	TPPFVEQPDSPAISVV	1681.8563	6.1535	30	11	10.868	5.487	49.881	0.511	3	Medium	0.206	0.151894
MelB_NB	MELB	453	468	TPPFVEQPDSPAISVV	1681.8563	6.1874	300	11	11	5.186	47.147	1.13	3	Medium	0.455	0.0483783
MelB_NB	MELB	453	468	TPPFVEQPDSPAISVV	1681.8563	6.1338	3000	11	11	6.05	54.996	0.995	3	Medium	0.401	0.446073
MelB_NB	MELB	453	469	TPPFVEQPDSPAISVVA	1752.8934	5.8984	0	12	0	0	0	n/a	1	Medium	0
MelB_NB	MELB	453	469	TPPFVEQPDSPAISVVA	1752.8934	5.887	30	12	11.868	7.469	62.242	0.529	3	Medium	0.213	0.421127
MelB_NB	MELB	453	469	TPPFVEQPDSPAISVVA	1752.8934	5.891	300	12	12	7.227	60.228	1.436	3	Medium	0.578	0.654002
MelB_NB	MELB	453	469	TPPFVEQPDSPAISVVA	1752.8934	5.9338	3000	12	12	7.892	65.764	1.351	3	Medium	0.544	0.727408
MelB_NB	MELB	453	474	TPPFVEQPDSPAISVVATSDVK	2283.1634	5.3838	0	17	0	0	0	n/a	1	High	0
MelB_NB	MELB	453	474	TPPFVEQPDSPAISVVATSDVK	2283.1634	5.3577	30	17	16.774	10.09	59.355	0.235	3	Medium	0.095	0.128187
MelB_NB	MELB	453	474	TPPFVEQPDSPAISVVATSDVK	2283.1634	5.2987	300	17	17	9.771	57.476	0.389	3	Medium	0.157	0.00753255
MelB_NB	MELB	453	474	TPPFVEQPDSPAISVVATSDVK	2283.1634	5.3037	3000	17	17	10.579	62.23	0.308	3	Medium	0.124	0.0990796
MelB_NB	MELB	465	474	ISVVATSDVK	1017.5706	2.3062	0	8	0	0	0	n/a	1	Medium	0
MelB_NB	MELB	465	474	ISVVATSDVK	1017.5706	2.2895	30	8	7.829	5.457	68.212	0.515	3	Medium	0.207	0.109765
MelB_NB	MELB	465	474	ISVVATSDVK	1017.5706	2.288	300	8	8	5.531	69.137	0.232	3	Medium	0.094	0.847848
MelB_NB	MELB	465	474	ISVVATSDVK	1017.5706	2.3199	3000	8	8	5.507	68.838	0.507	3	Medium	0.204	0.640786
MelB_NB	MELB	467	474	VVATSDVK	817.4545	1.6576	0	6	0	0	0	n/a	1	Medium	0
MelB_NB	MELB	467	474	VVATSDVK	817.4545	1.6659	30	6	5.907	3.463	57.716	0.116	3	Medium	0.047	0.735047
MelB_NB	MELB	467	474	VVATSDVK	817.4545	1.6638	300	6	6	3.238	53.972	0.53	3	Medium	0.213	0.405902
MelB_NB	MELB	467	474	VVATSDVK	817.4545	1.7024	3000	6	6	3.244	54.061	0.452	3	Medium	0.182	0.931198
MelB_NB	MELB	472	485	DVKAHHHHHHHHHH	1801.8271	1.5098	0	12	0	0	0	n/a	1	Medium	0
MelB_NB	MELB	472	485	DVKAHHHHHHHHHH	1801.8271	1.5125	30	12	11.998	0.852	7.103	2.333	3	Medium	0.939	0.476418
MelB_NB	MELB	472	485	DVKAHHHHHHHHHH	1801.8271	1.5296	300	12	12	0.881	7.343	0.595	4	Medium	0.374	0.546485
MelB_NB	MELB	472	485	DVKAHHHHHHHHHH	1801.8271	0	3000	12	12
MelB_NB	MELB	475	485	AHHHHHHHHHH	1459.6368	1.2365	0	9	0	0	0	n/a	1	Medium	0
MelB_NB	MELB	475	485	AHHHHHHHHHH	1459.6368	1.2954	30	9	8.998	0.034	0.381	0.152	3	Medium	0.061	0.380934
MelB_NB	MELB	475	485	AHHHHHHHHHH	1459.6368	1.2174	300	9	9	0.002	0.02	0.014	3	Medium	0.006	0.484621
MelB_NB	MELB	475	485	AHHHHHHHHHH	1459.6368	0	3000	9	9
